# Supplementary material for: A systematic review with meta-analysis of biomarkers for detection of pulmonary arterial hypertension
Source: PubMed Central journal article supplement — ERJ Open Res. 2022 May 30;8(2):00009-2022. doi: 10.1183/23120541.00009-2022 (PMC9149393; doi:10.1183/23120541.00009-2022), 2022-05-30
Supplement: 00009-2022.SUPPLEMENT.pdf [file 00009-2022.SUPPLEMENT.pdf]

# Supplementary Appendix

## Manuscript Title

A Systematic Review with Meta-analysis of Biomarkers for detection of Pulmonary Arterial Hypertension

### Table of Contents

|                                                                                                                                                                                                                                              |         |
|----------------------------------------------------------------------------------------------------------------------------------------------------------------------------------------------------------------------------------------------|---------|
| <i>Supplementary Figure 1:</i>                                                                                                                                                                                                               |         |
| Summarized risk of bias table (QUADAS-2).....                                                                                                                                                                                                | p.2     |
| <i>Supplementary Figure 2:</i>                                                                                                                                                                                                               |         |
| Forest plots of non-selected haematologic biomarkers; including PDW, MPV, thrombocytes, Hb, Hct, leukocytes. ....                                                                                                                            | p.3     |
| <i>Supplementary Figure 3:</i>                                                                                                                                                                                                               |         |
| Forest plots of non-selected metabolic biomarkers, including total cholesterol, triglycerides, glucose, HDL-c .....                                                                                                                          | p.4     |
| <i>Supplementary Figure 4:</i>                                                                                                                                                                                                               |         |
| Forest plots of non-selected coagulation biomarkers, including fibrinogen. ....                                                                                                                                                              | p.5     |
| <i>Supplementary Figure 5:</i>                                                                                                                                                                                                               |         |
| Forest plots of non-selected inflammatory biomarkers, including; sVCAM-1, CXCL-10, CRP, TIMP-1 sP-selectin. ....                                                                                                                             | p.6     |
| <i>Supplementary Figure 6:</i>                                                                                                                                                                                                               |         |
| Forest plots of non-selected renal biomarkers, including; BUN, creatinine, eGFR. ....                                                                                                                                                        | p.7     |
| <i>Supplementary Figure 7:</i>                                                                                                                                                                                                               |         |
| Forest plots of non-selected hepatic biomarkers, including; ALT. ....                                                                                                                                                                        | p.8     |
| <i>Supplementary Figure 8:</i>                                                                                                                                                                                                               |         |
| Funel plots of all meta-analysis indicating publication bias .....                                                                                                                                                                           | p.9-10  |
| <br>                                                                                                                                                                                                                                         |         |
| <i>Supplementary Table 1:</i>                                                                                                                                                                                                                |         |
| Search strategies biomarkers. ....                                                                                                                                                                                                           | p.11-16 |
| <i>Supplementary Table 2:</i>                                                                                                                                                                                                                |         |
| Adjusted risk of bias assessment tool according to the QUADAS-2 .....                                                                                                                                                                        | p.17    |
| <i>Supplementary Table 3:</i>                                                                                                                                                                                                                |         |
| Detailed overview of all publications, including location of blood draw, number of subjects included, treatment status, and concerns regarding inclusion methodology.....                                                                    | p.18-19 |
| <i>Supplementary Table 4:</i>                                                                                                                                                                                                                |         |
| Pooled biomarker levels described in described in three or more publications, including 5-HT; serotonin, ADMA, Ang-1, BNP, ET-1, Gal-3, HGF, HMGB1, IL-8, MMP-2, Na, PIGF, SCF, SOD, sVCAM, TGF-b1, Tie-2, TIMP-4, VEGF, TNF-a.....          | p.20    |
| <i>Supplementary Table 5:</i>                                                                                                                                                                                                                |         |
| Pooled biomarker levels described in two publications, including Cav-1, RBC, HbA1c, IL-12, K, MCV, MDA, NO, OPN, Pim-1, Se-P, sRAGE, sST2, sTWEAK, FGF-2, ENG, KYN, MCP-1, Nox, OPG, PIIINP, sFLT-1, TFPI, TRP, VEGFR-1. ....                | p.21    |
| <i>Supplementary Table 6;</i>                                                                                                                                                                                                                |         |
| Mean difference, standardized mean difference and OR of 26 meta-analyses. Including RDW, PDW, MPV, Hb, Hct, TG, LDL-c, HDL-c, sVCAM-1, CXCL-10, IL-6, TIMP-1, p-Selectin, CRP, NT-proBNP, UA, eGFR ALT .....                                 | p.22    |
| <i>Supplementary Table 7:</i>                                                                                                                                                                                                                |         |
| Estimation of risk of bias by Egger's regression, Duval & Tweedie's trim and fill, and Orwin's fail safe. Including RDW, PDW, MPV, Hb, Hct, TG, LDL-c, HDL-c, sVCAM-1, CXCL-10, IL-6, TIMP-1, p-Selectin, CRP, NT-proBNP, UA, eGFR ALT ..... | p.23    |
| <i>Supplementary table 8:</i>                                                                                                                                                                                                                |         |
| Overview of patient inclusion, sample tissue and measurement methods employed by publications using an omics approach. ....                                                                                                                  | p.24    |

**Fig. S1**

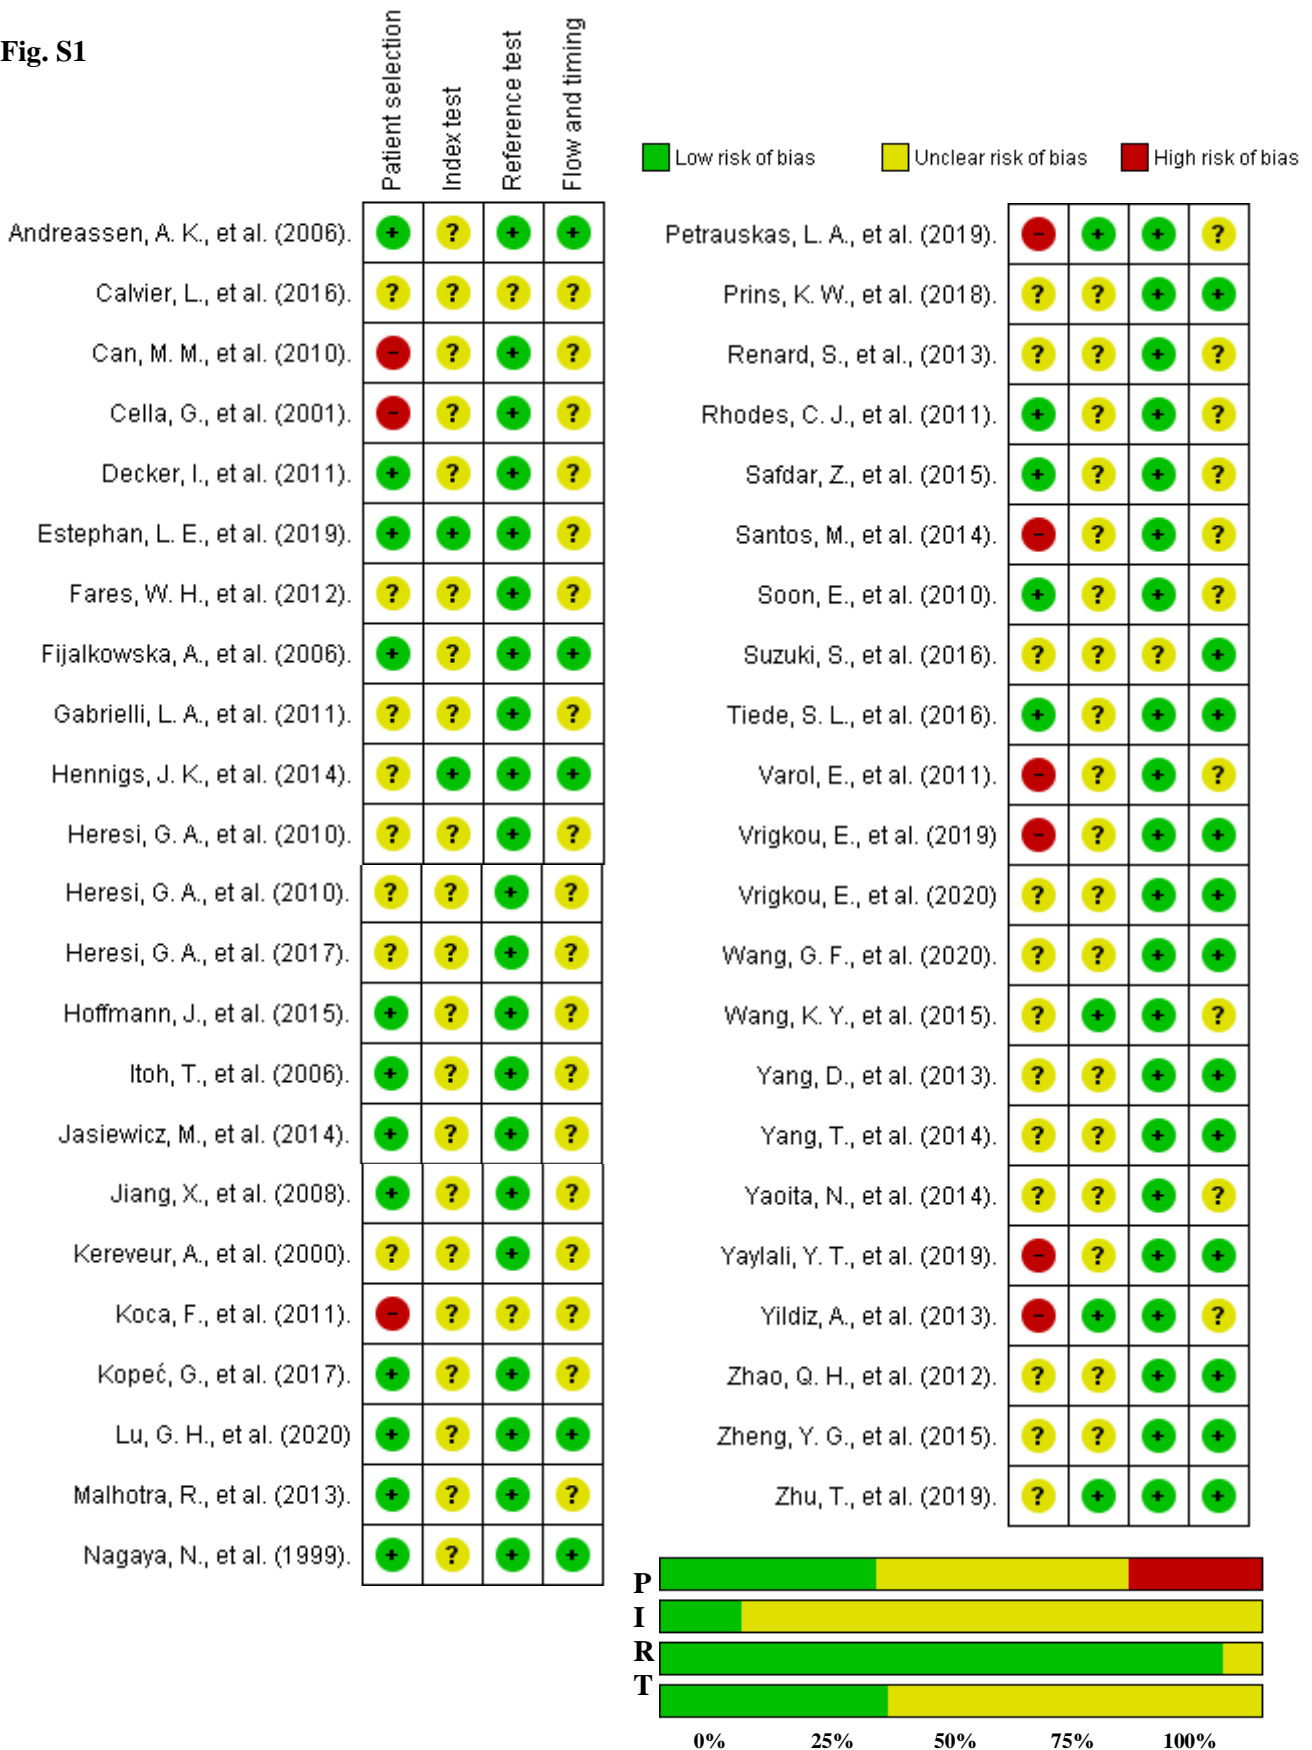

**Fig. S1** Summarized risk of bias table, P; patients, I; index (biomarker) test, R; reference test (diagnosis), T; flow and timing. QUADAS-2.

**Fig. S2 Haematologic markers**

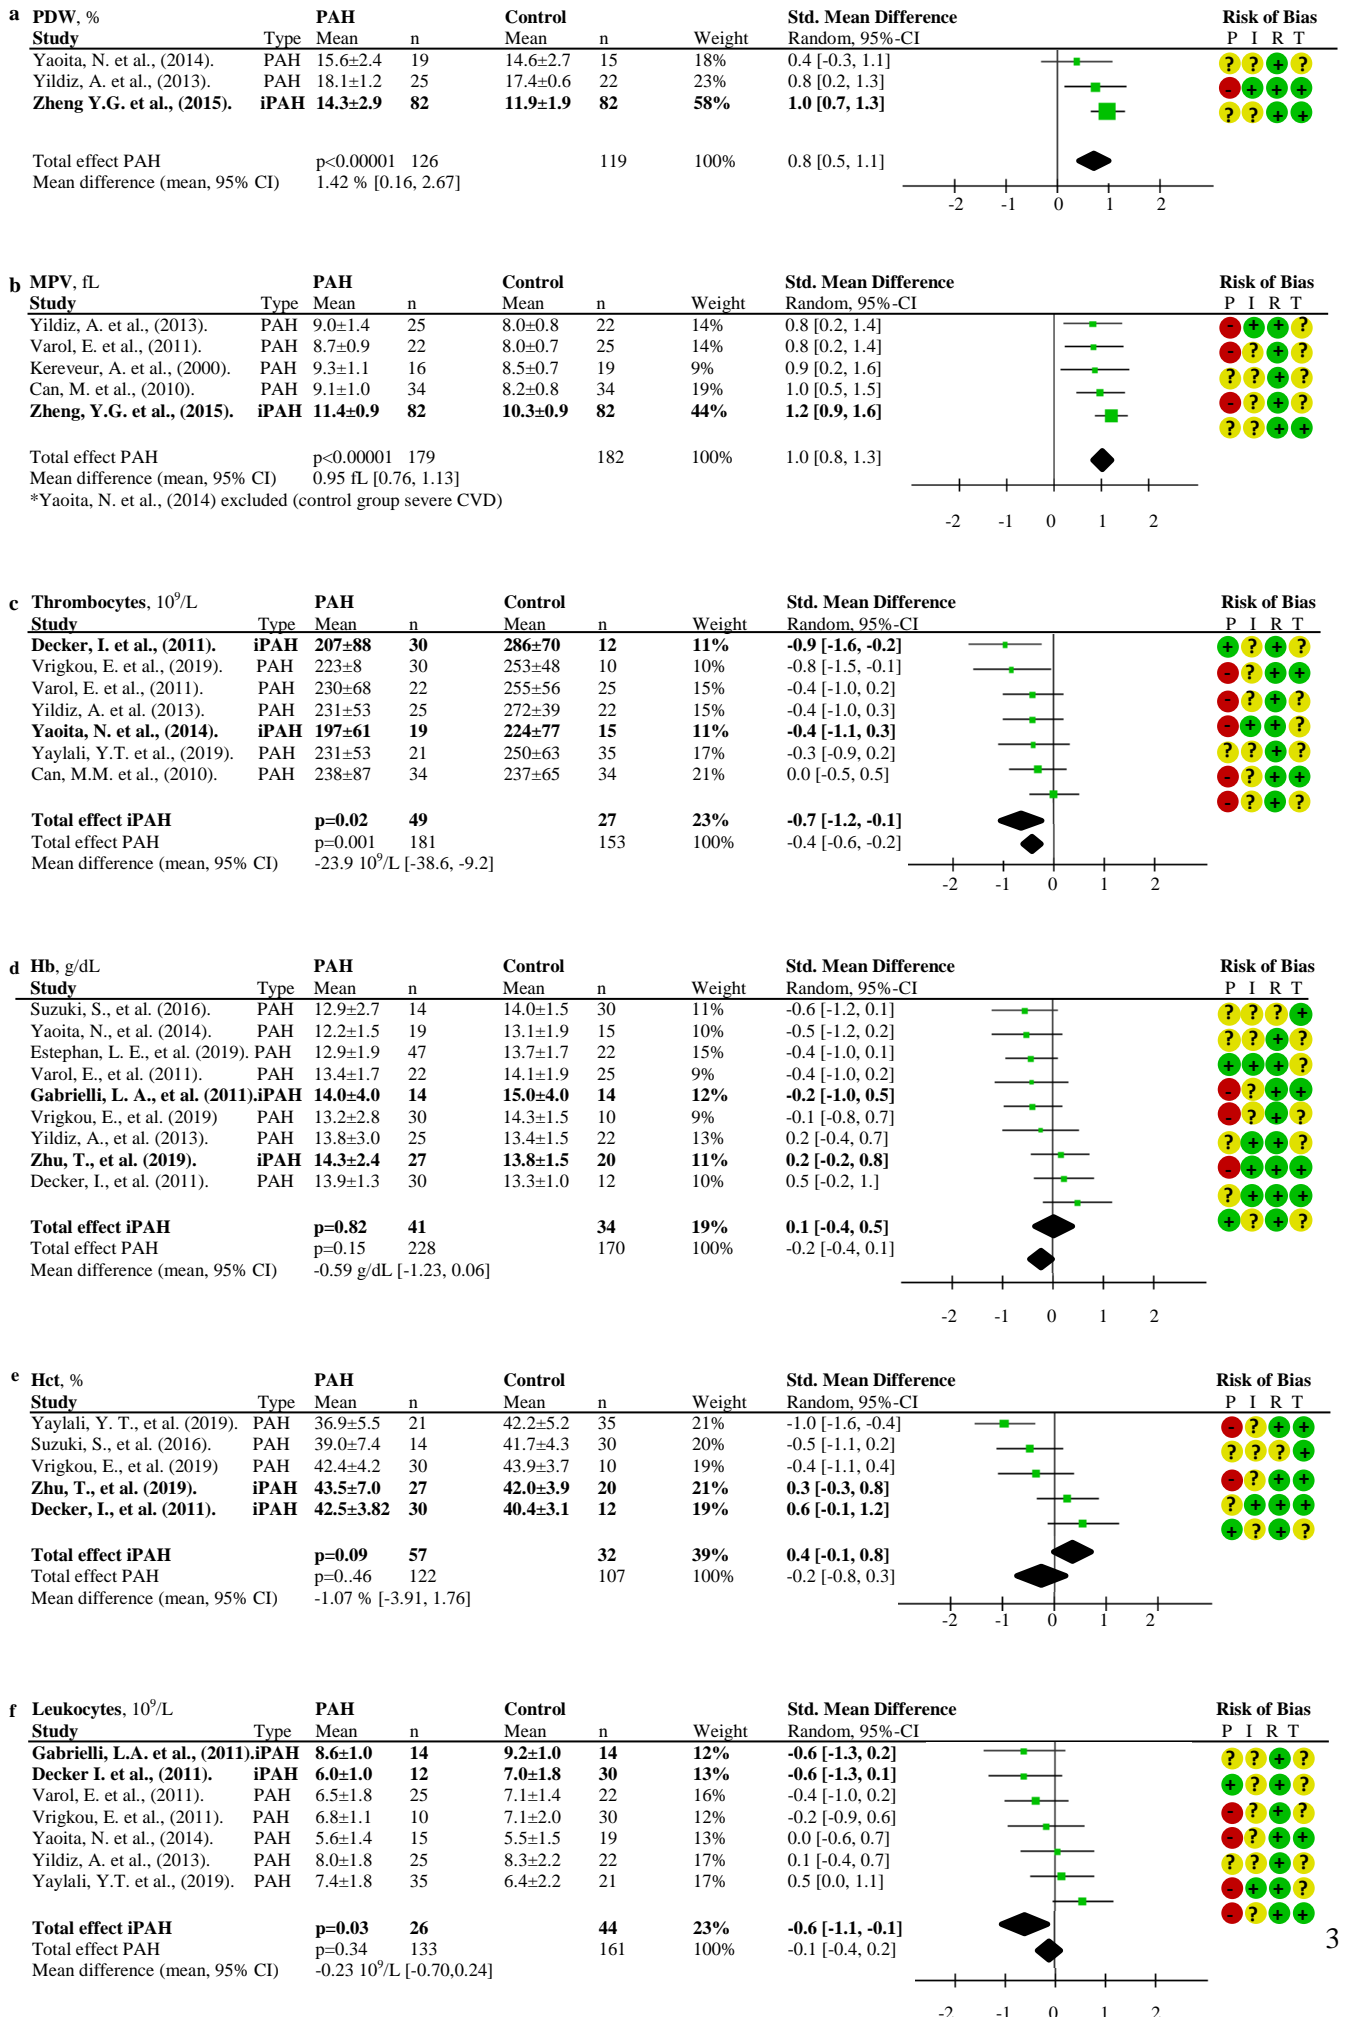

**Fig. S2 Forest plots of non-selected haematologic biomarkers**, including; PDW; platelet distribution width, MPV; mean platelet volume, thrombocytes, Hb; hemoglobin, Hct; hematocrit, leukocytes. Risk of bias (QUADAS-2), P: patient inclusion, I; index-test (biomarker), R; reference standard (diagnosis), T; flow and timing. Publications pressed in bold measured biomarker levels in iPAH and/or hPAH uniquely.

**Fig. S3**

**Metabolic markers**

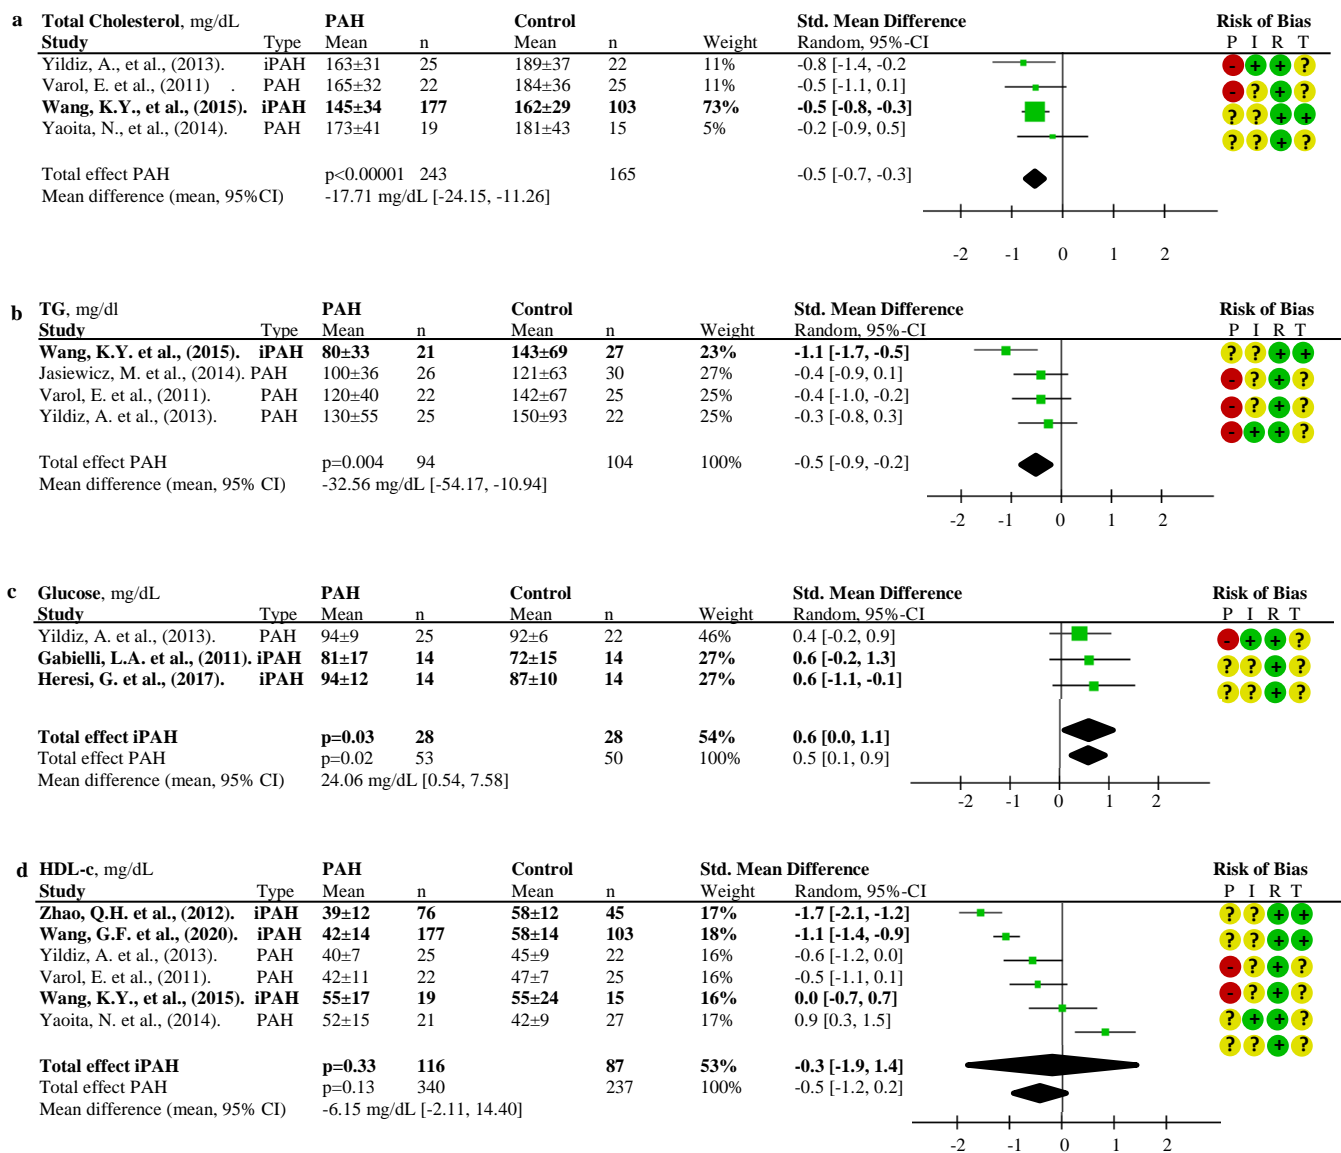

**Fig. S3 Forest plots of non-selected metabolic biomarkers**, including total cholesterol, TG; triglycerides, glucose, HDL-c; high density lipid-cholesterol. risk of bias (QUADAS-2), P: patient inclusion, I; index-test (biomarker), R; refence standard (diagnosis), T; flow and timing. Publications pressed in bold measured biomarker levels in iPAH and/or hPAH uniquely.

**Fig. S4**

**Coagulation markers**

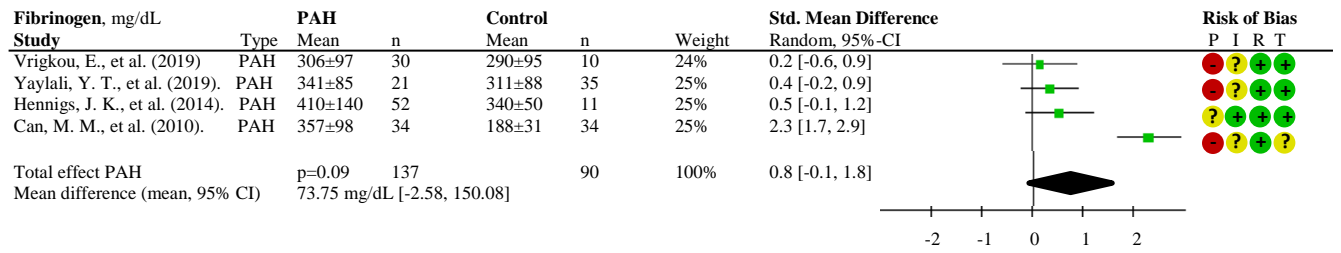

**Fig. S4 Forest plots of non-selected coagulation biomarkers, including fibrinogen.** Risk of bias (QUADAS-2), P: patient inclusion, I; index-test (biomarker), R; reference standard (diagnosis), T; flow and timing. Publications pressed in bold measured biomarker levels in iPAH and/or hPAH uniquely.

**Fig. S5**

**Inflammation**

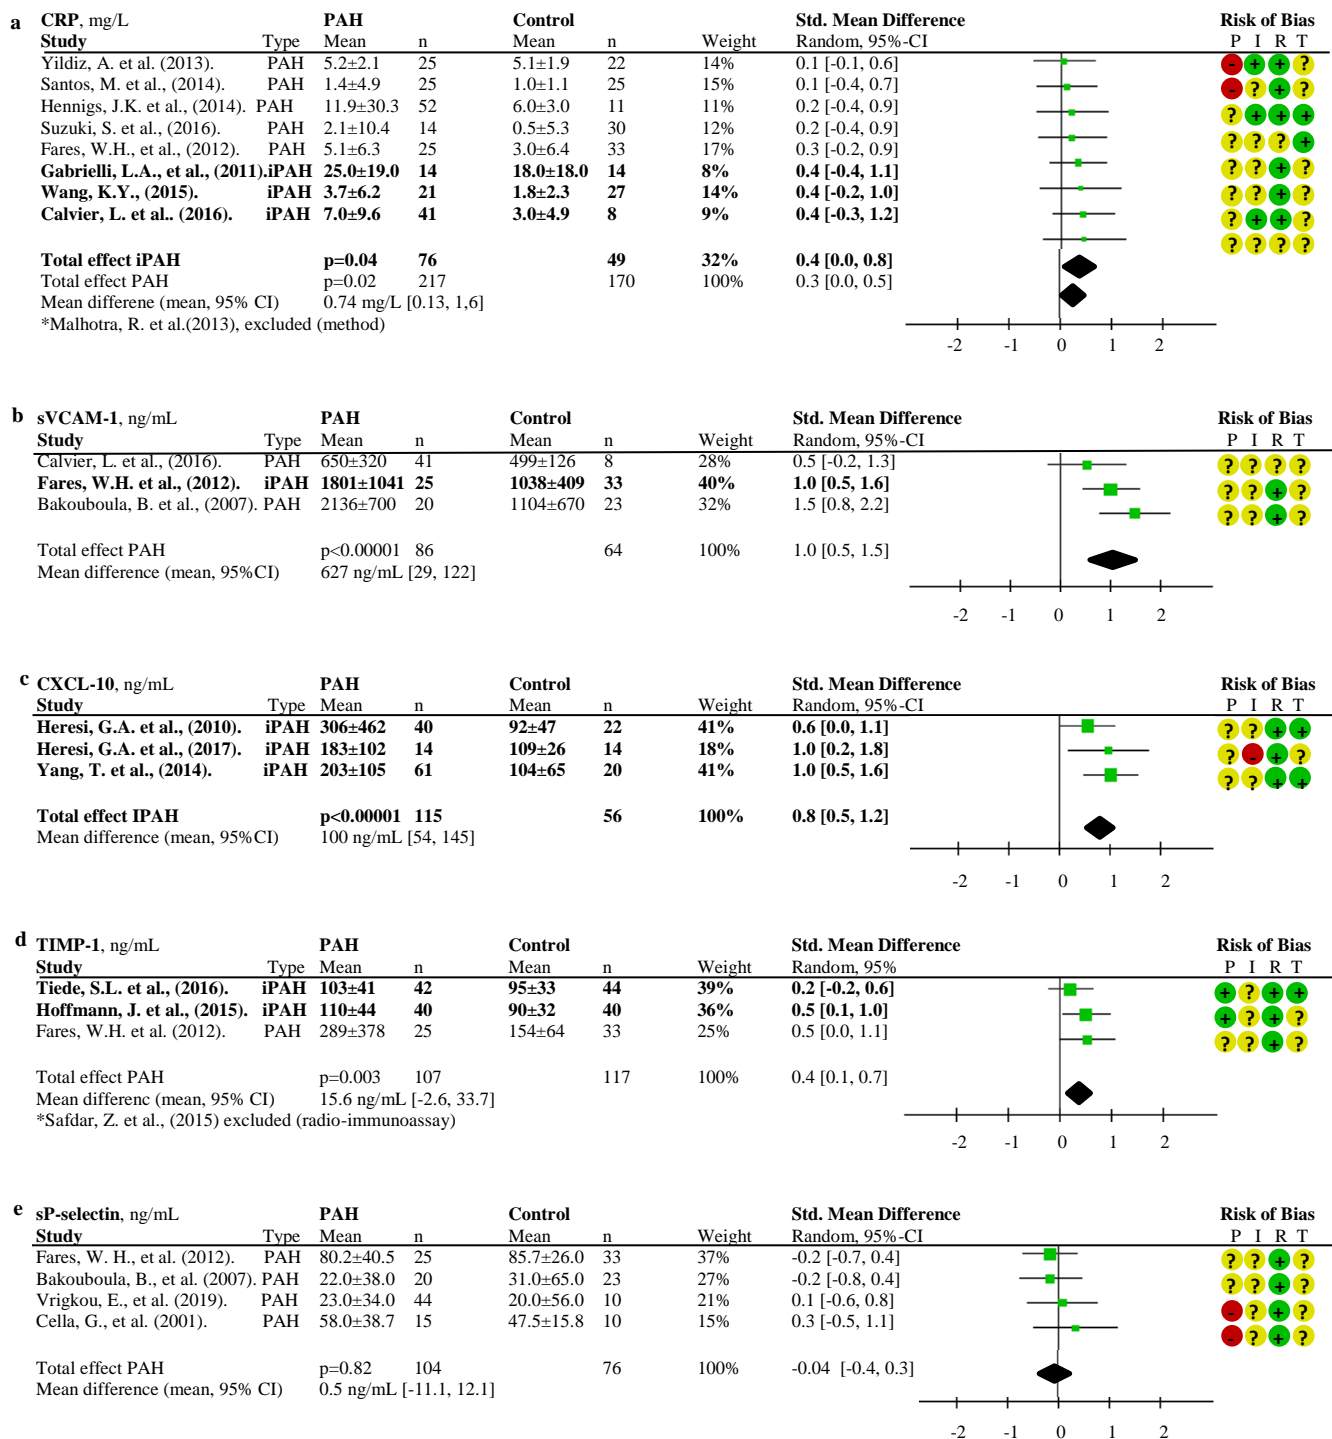

**Fig. S5 Forest plots of non-selected inflammatory biomarkers, including; sVCAM-1; circulating vascular cell adhesion molecule-1, CXCL-10; C-X-C motif chemokine ligand-10, CRP; C-reactive protein, TIMP-1; tissue inhibitors of metalloproteinases-1, sP-selectin; soluble P-selectin. Risk of bias (QUADAS-2), P: patient inclusion, I; index-test (biomarker), R; reference standard (diagnosis), T; flow and timing. Publications pressed in bold measured biomarker levels in iPAH and/or hPAH uniquely.**

**Fig. S6**

**Renal**

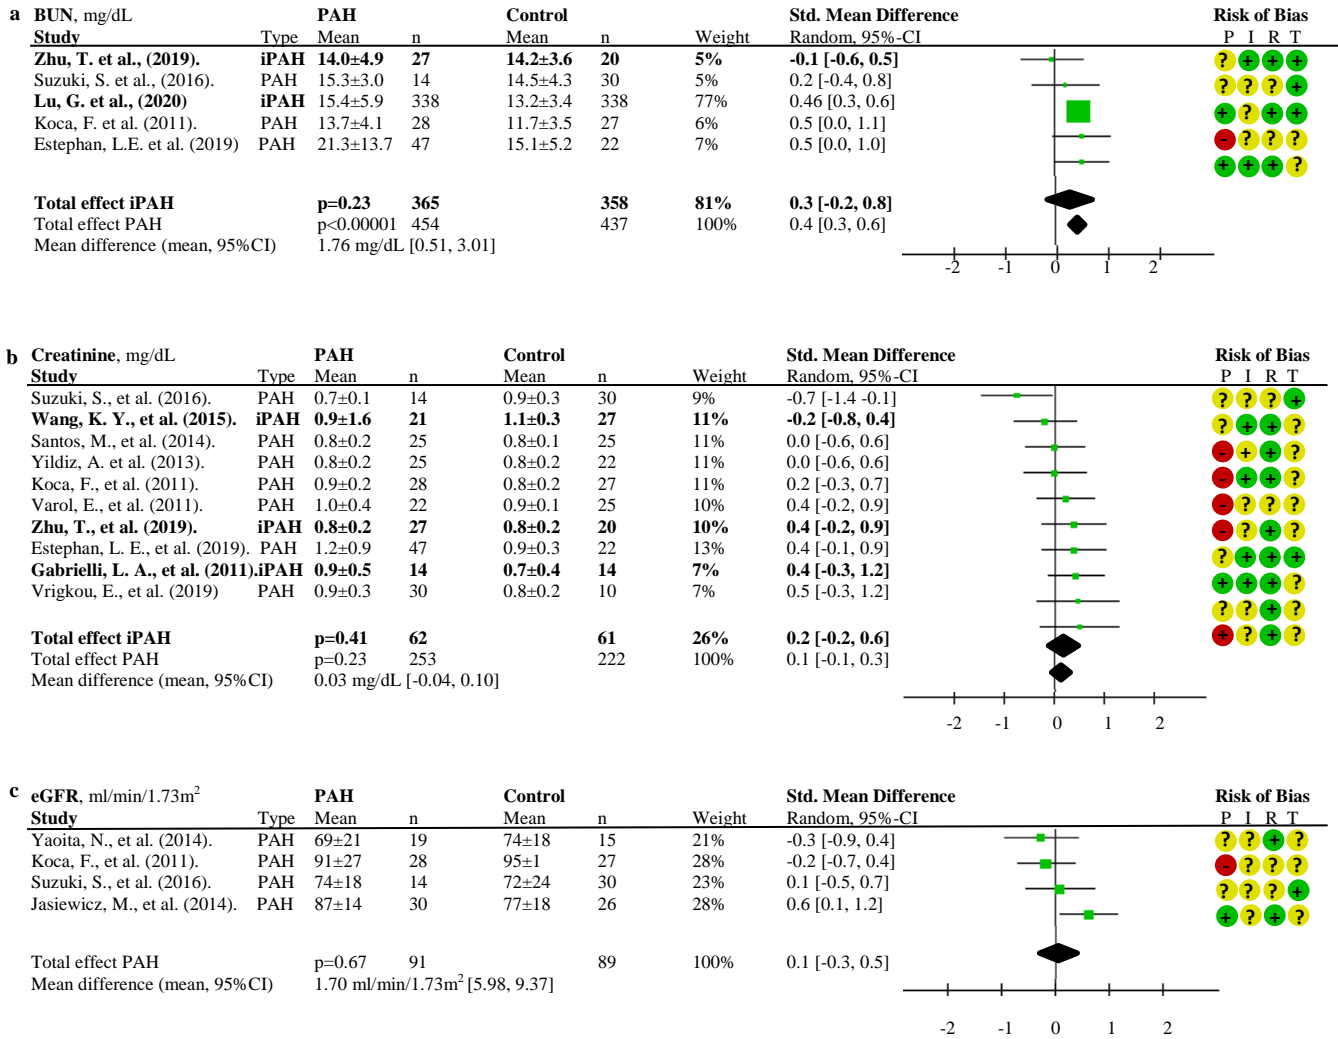

**Fig. S6 Forest plots of non-selected renal biomarkers, including; BUN; brain urea nitrogen, creatinine, eGFR; estimated glomerular filtration rate. Risk of bias (QUADAS-2), P: patient inclusion, I; index-test (biomarker), R; reference standard (diagnosis), T; flow and timing. Publications pressed in bold measured biomarker levels in iPAH and/or hPAH uniquely.**

**Fig. S7**

**Hepatic**

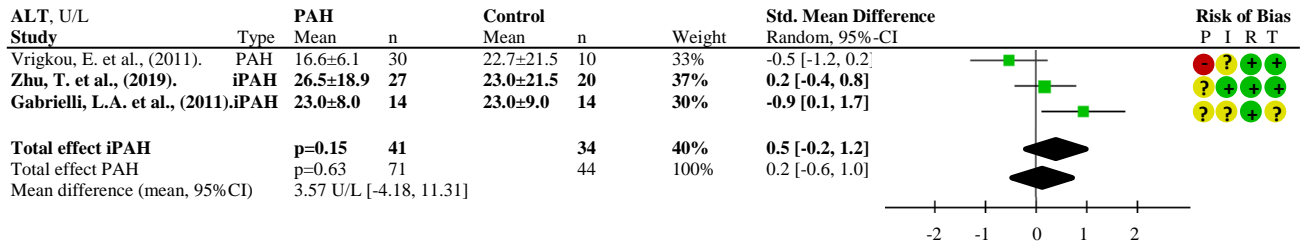

**Fig. S7 Forest plots of non-selected hepatic biomarkers, including; ALT; alanine transaminase. Risk of bias (QUADAS-2), P: patient inclusion, I; index-test (biomarker), R; reference standard (diagnosis), T; flow and timing. Publications pressed in bold measured biomarker levels in iPAH and/or hPAH uniquely.**



**Figure S8**

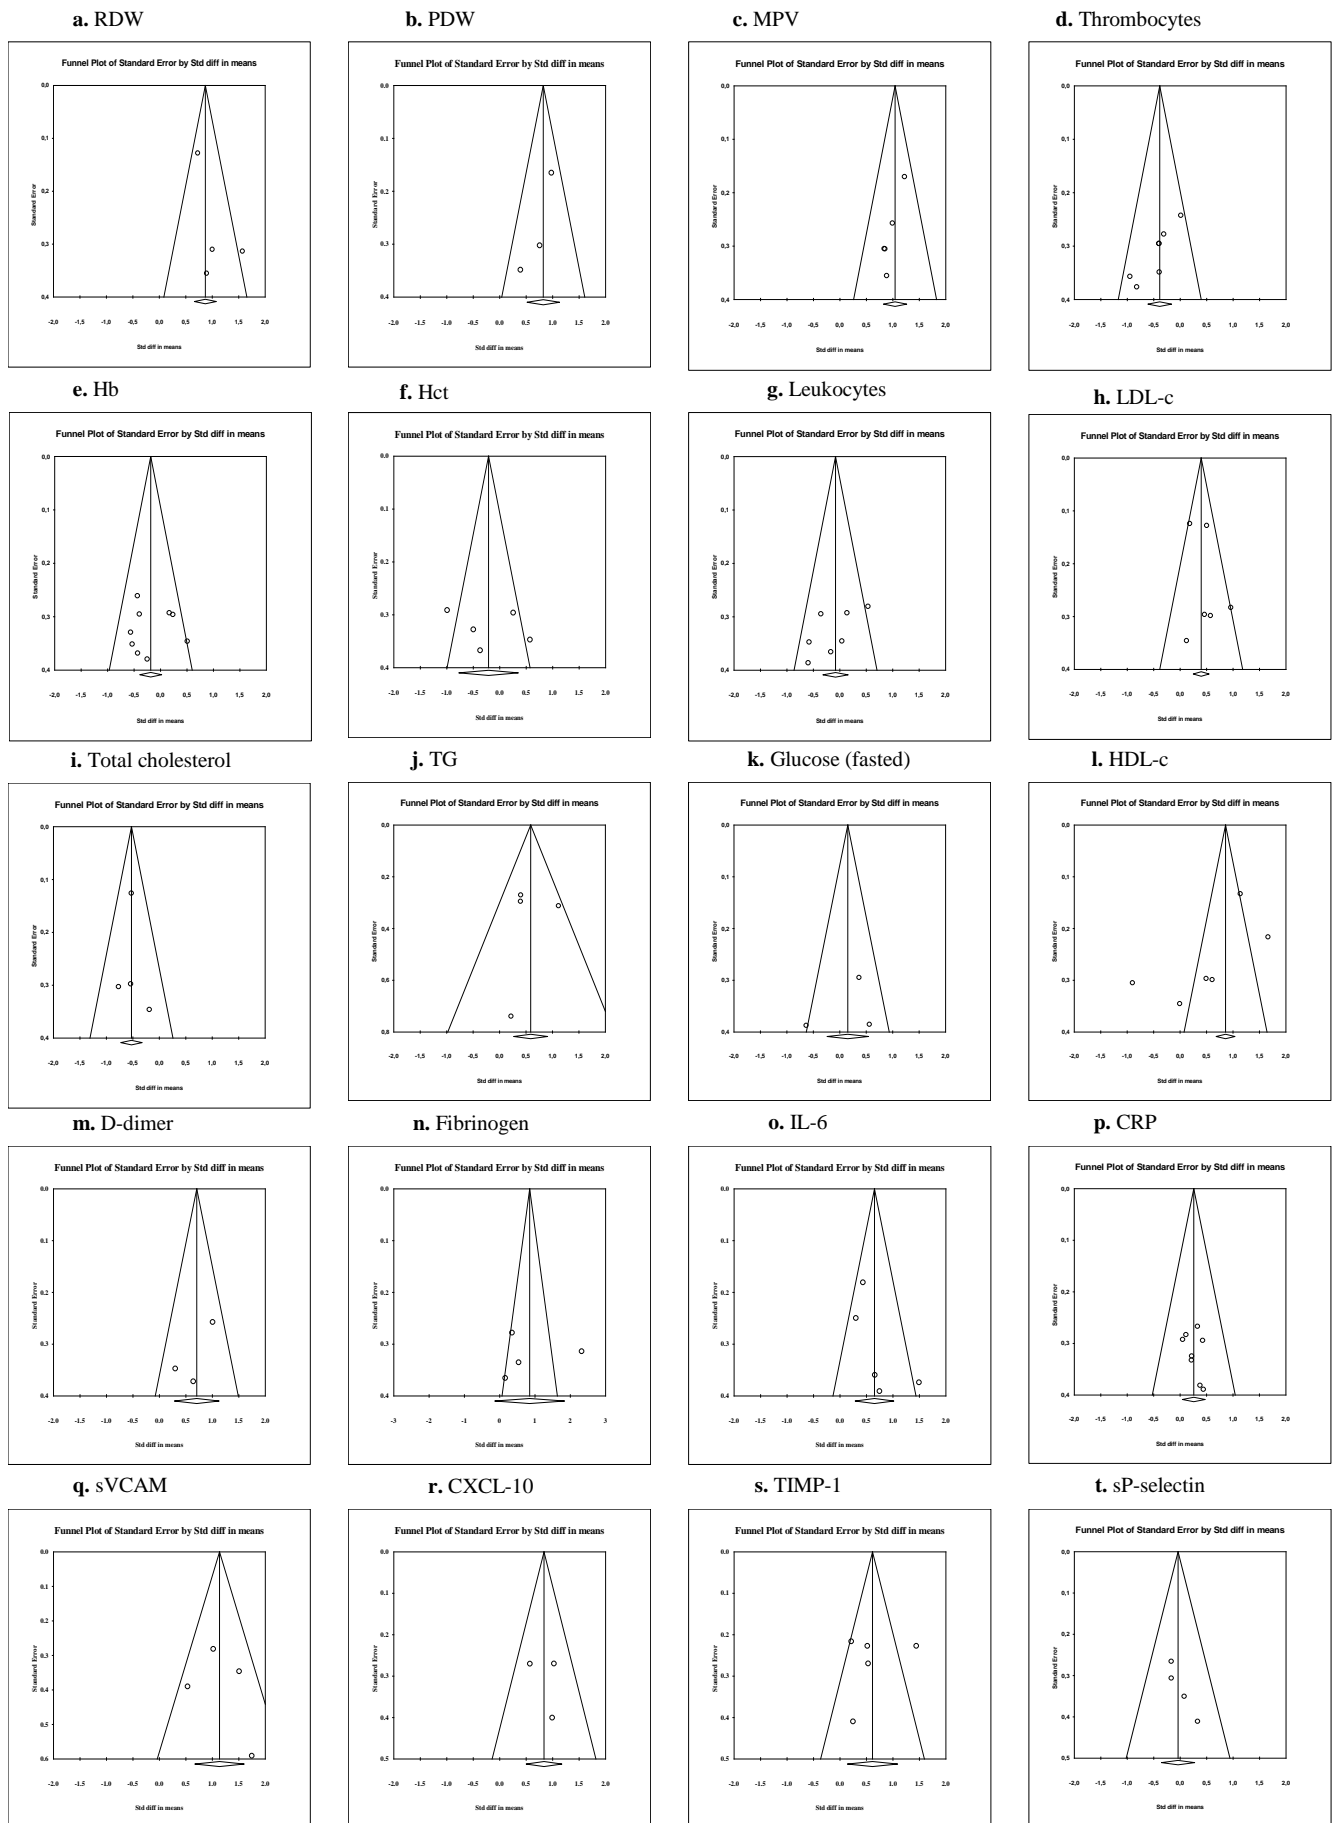

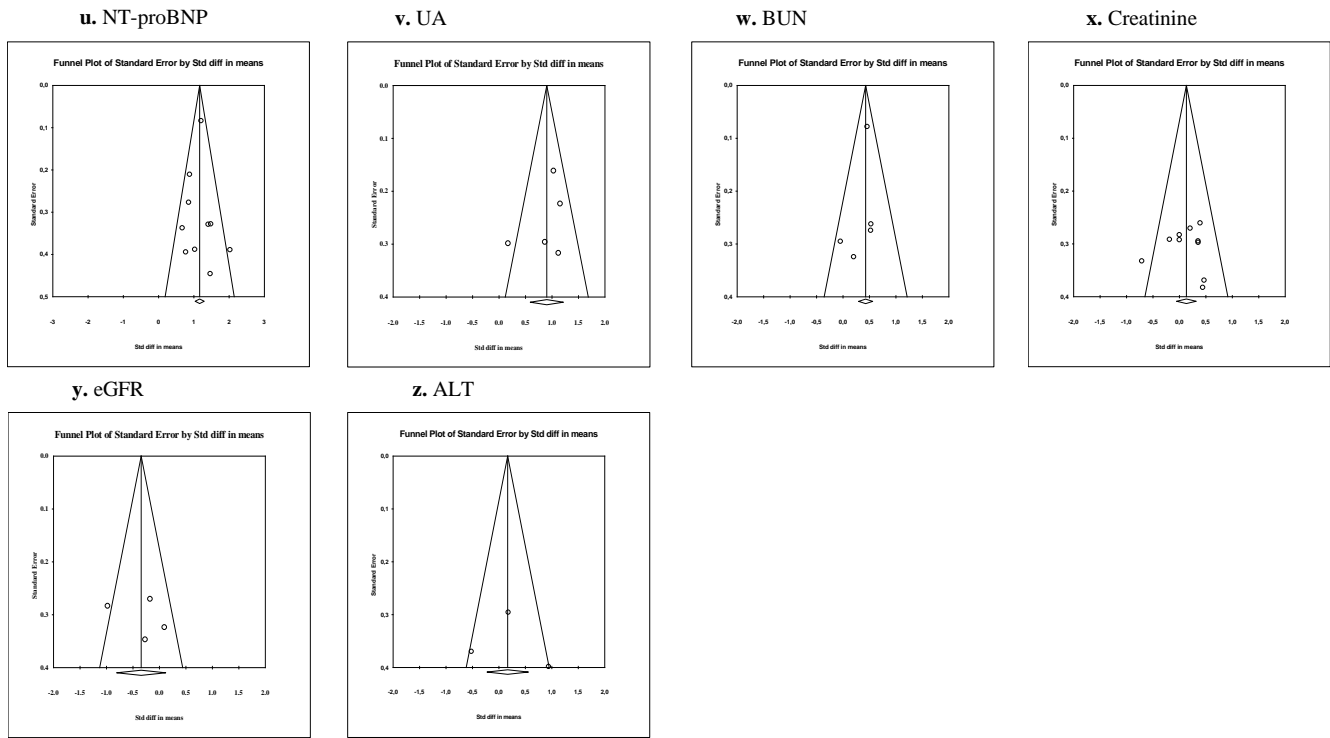

**Fig. S8 Funnel plots of all meta-analysis indicating publication bias.** X-axis; standardized difference in means, y-axis; standard error. Each dot represents one publication.



|    |                                                                                                                                                                                                                                                                                                                                                                                                                                                                                                                                                                                                                                                                                                                                                                                                                                                      |         |
|----|------------------------------------------------------------------------------------------------------------------------------------------------------------------------------------------------------------------------------------------------------------------------------------------------------------------------------------------------------------------------------------------------------------------------------------------------------------------------------------------------------------------------------------------------------------------------------------------------------------------------------------------------------------------------------------------------------------------------------------------------------------------------------------------------------------------------------------------------------|---------|
|    | protein*[tiab] OR "rank ligand*[tiab] OR "recombinant human dimeric tnf receptor type ii igg fusion protein*[tiab] OR "ro236019"[tiab] OR "ru49637"[tiab] OR "scf receptor*[tiab] OR "stem cell factor receptor*[tiab] OR "taci receptor*[tiab] OR "tcgf*[tiab] OR "thank protein*[tiab] OR "thrombocytopenin*[tiab] OR "thrombopoietin*[tiab] OR "tnfrsf6 receptor*[tiab] OR "tnf receptor fusion protein*[tiab] OR "trance receptor*[tiab] OR "tweak receptor*[tiab] OR "transforming growth factor*[tiab] OR "tumor necrosis factor*[tiab]                                                                                                                                                                                                                                                                                                        |         |
| #5 | "Blood Cells"[Mesh] OR "blood cell*[tiab] OR "thrombocyt*[tiab] OR "platelet*[tiab] OR "erythrocyt*[tiab] OR "hemocyt*[tiab] OR "leukocyt*[tiab] OR "reticulocyt*[tiab] OR "granulocyt*[tiab] OR "mononuclear cell*[tiab] OR "stem cell*[tiab] OR "progenitor cell*[tiab] OR "mother cell*[tiab] OR "colony forming*[tiab] OR "basophil*[tiab] OR "eosinophil*[tiab] OR "neutrophil*[tiab] OR "lymphocyt*[tiab] OR "monocyt*[tiab] OR "killer cell*[tiab] OR "nk cell*[tiab] OR "precursor cell*[tiab] OR "suppressor cell*[tiab] OR "myelocyt*[tiab] OR "myeloblast*[tiab] OR "B-cell*[tiab] OR "T-cell*[tiab] OR "T helper cel*[tiab] OR "Treg*[tiab] OR "macrophage*[tiab] OR "myeloid cell*[tiab] OR "dendritic cell*[tiab] OR "antigen-presenting cell*[tiab] OR "immune cell*[tiab] OR "inflammatory cell*[tiab] OR "CD4*[tiab] OR "CD8*[tiab] | 2350640 |
| #4 | "Extracellular Vesicles"[Mesh] OR "microparticle*[tiab] OR "microvesicle*[tiab] OR "exosom*[tiab] OR "ectosom*[tiab] OR "extracellular vesicle*[tiab] OR "exovesicle*[tiab] OR "apoptotic bod*[tiab]                                                                                                                                                                                                                                                                                                                                                                                                                                                                                                                                                                                                                                                 | 46380   |
| #3 | "MicroRNAs"[Mesh] OR "MicroRNA*[tiab] OR "Micro RNA*[tiab] OR "miRNA*[tiab] OR "pri-miRNA*[tiab] OR "strRNA*[tiab] OR "Small Temporal RNA*[tiab] OR "pre-miRNA*[tiab] OR "lncRNA* [tiab] OR "non-coding RNA*[tiab] OR "noncoding RNA*[tiab] OR "ncRNA*[tiab]                                                                                                                                                                                                                                                                                                                                                                                                                                                                                                                                                                                         | 150417  |
| #2 | ("Biomarkers"[Mesh] OR "biomarker*[tiab] OR "marker*[tiab] OR "indicator*[tiab])                                                                                                                                                                                                                                                                                                                                                                                                                                                                                                                                                                                                                                                                                                                                                                     | 1729998 |
| #1 | ("Familial Primary Pulmonary Hypertension"[Mesh] OR "pulmonary arterial hypertensi*[tiab] OR "pulmonary artery hypertensi*[tiab] OR "idiopathic pulmonary hypertens*[tiab] OR "hereditary pulmonary hypertens*[tiab] OR "heritable pulmonary hypertens*[tiab] OR "primary pulmonary hypertensi*[tiab] OR "primary pulmonary hypertens*[tiab])                                                                                                                                                                                                                                                                                                                                                                                                                                                                                                        | 16546   |

Embbase.com 1506 results, 736 excluding conference abstracts (28 January, 2021)

| No. | Query                                                                                                                                                                                                                                                                                                                                                                                                                                                                                                                                                                                                                                                                                                                                                                                                                                                                                                                                                                                                                                                                                                                                                                                                                                                                                                                                                                                                                                                                                                                                                                                                                                                                                                                                                                                                                                                                                                                                                                                                                                                                                                                                                                                                                                                                                                                                                                                                                                                                                                                                                                                                                                                                                                                                                                                                                                                                                                                                                                                                                                                                                                                                                                                                                                                                                                                                                                                                                                                                                                                                                                                                                                                                                                                                                                                                                                                                                                                                                                                                                                                                                                                                                                                                                                                                                                                                                                                                                                                                                                                                                                                                                                                                                                                                                                                                                                                                                                                                                                                                                                                                                                                                                                                                                                                                                                                                                                                                                                                                                                                                                                                                                                                                                                                                                                                                                                                                                                                                                                                                                                                                                                                                             | Results |
|-----|---------------------------------------------------------------------------------------------------------------------------------------------------------------------------------------------------------------------------------------------------------------------------------------------------------------------------------------------------------------------------------------------------------------------------------------------------------------------------------------------------------------------------------------------------------------------------------------------------------------------------------------------------------------------------------------------------------------------------------------------------------------------------------------------------------------------------------------------------------------------------------------------------------------------------------------------------------------------------------------------------------------------------------------------------------------------------------------------------------------------------------------------------------------------------------------------------------------------------------------------------------------------------------------------------------------------------------------------------------------------------------------------------------------------------------------------------------------------------------------------------------------------------------------------------------------------------------------------------------------------------------------------------------------------------------------------------------------------------------------------------------------------------------------------------------------------------------------------------------------------------------------------------------------------------------------------------------------------------------------------------------------------------------------------------------------------------------------------------------------------------------------------------------------------------------------------------------------------------------------------------------------------------------------------------------------------------------------------------------------------------------------------------------------------------------------------------------------------------------------------------------------------------------------------------------------------------------------------------------------------------------------------------------------------------------------------------------------------------------------------------------------------------------------------------------------------------------------------------------------------------------------------------------------------------------------------------------------------------------------------------------------------------------------------------------------------------------------------------------------------------------------------------------------------------------------------------------------------------------------------------------------------------------------------------------------------------------------------------------------------------------------------------------------------------------------------------------------------------------------------------------------------------------------------------------------------------------------------------------------------------------------------------------------------------------------------------------------------------------------------------------------------------------------------------------------------------------------------------------------------------------------------------------------------------------------------------------------------------------------------------------------------------------------------------------------------------------------------------------------------------------------------------------------------------------------------------------------------------------------------------------------------------------------------------------------------------------------------------------------------------------------------------------------------------------------------------------------------------------------------------------------------------------------------------------------------------------------------------------------------------------------------------------------------------------------------------------------------------------------------------------------------------------------------------------------------------------------------------------------------------------------------------------------------------------------------------------------------------------------------------------------------------------------------------------------------------------------------------------------------------------------------------------------------------------------------------------------------------------------------------------------------------------------------------------------------------------------------------------------------------------------------------------------------------------------------------------------------------------------------------------------------------------------------------------------------------------------------------------------------------------------------------------------------------------------------------------------------------------------------------------------------------------------------------------------------------------------------------------------------------------------------------------------------------------------------------------------------------------------------------------------------------------------------------------------------------------------------------------------------------------------------------|---------|
| #10 | #9 NOT 'conference abstract'/it                                                                                                                                                                                                                                                                                                                                                                                                                                                                                                                                                                                                                                                                                                                                                                                                                                                                                                                                                                                                                                                                                                                                                                                                                                                                                                                                                                                                                                                                                                                                                                                                                                                                                                                                                                                                                                                                                                                                                                                                                                                                                                                                                                                                                                                                                                                                                                                                                                                                                                                                                                                                                                                                                                                                                                                                                                                                                                                                                                                                                                                                                                                                                                                                                                                                                                                                                                                                                                                                                                                                                                                                                                                                                                                                                                                                                                                                                                                                                                                                                                                                                                                                                                                                                                                                                                                                                                                                                                                                                                                                                                                                                                                                                                                                                                                                                                                                                                                                                                                                                                                                                                                                                                                                                                                                                                                                                                                                                                                                                                                                                                                                                                                                                                                                                                                                                                                                                                                                                                                                                                                                                                                   | 736     |
| #9  | #8 NOT ([animals]/lim NOT [humans]/lim)                                                                                                                                                                                                                                                                                                                                                                                                                                                                                                                                                                                                                                                                                                                                                                                                                                                                                                                                                                                                                                                                                                                                                                                                                                                                                                                                                                                                                                                                                                                                                                                                                                                                                                                                                                                                                                                                                                                                                                                                                                                                                                                                                                                                                                                                                                                                                                                                                                                                                                                                                                                                                                                                                                                                                                                                                                                                                                                                                                                                                                                                                                                                                                                                                                                                                                                                                                                                                                                                                                                                                                                                                                                                                                                                                                                                                                                                                                                                                                                                                                                                                                                                                                                                                                                                                                                                                                                                                                                                                                                                                                                                                                                                                                                                                                                                                                                                                                                                                                                                                                                                                                                                                                                                                                                                                                                                                                                                                                                                                                                                                                                                                                                                                                                                                                                                                                                                                                                                                                                                                                                                                                           | 1506    |
| #8  | #1 AND #2 AND (#3 OR #4 OR #5 OR #6 OR #7)                                                                                                                                                                                                                                                                                                                                                                                                                                                                                                                                                                                                                                                                                                                                                                                                                                                                                                                                                                                                                                                                                                                                                                                                                                                                                                                                                                                                                                                                                                                                                                                                                                                                                                                                                                                                                                                                                                                                                                                                                                                                                                                                                                                                                                                                                                                                                                                                                                                                                                                                                                                                                                                                                                                                                                                                                                                                                                                                                                                                                                                                                                                                                                                                                                                                                                                                                                                                                                                                                                                                                                                                                                                                                                                                                                                                                                                                                                                                                                                                                                                                                                                                                                                                                                                                                                                                                                                                                                                                                                                                                                                                                                                                                                                                                                                                                                                                                                                                                                                                                                                                                                                                                                                                                                                                                                                                                                                                                                                                                                                                                                                                                                                                                                                                                                                                                                                                                                                                                                                                                                                                                                        | 1740    |
| #7  | 'urine'/exp OR 'blood'/exp OR 'blood*':ti,ab,kw OR 'plasma*':ti,ab,kw OR 'serum*':ti,ab,kw OR 'sera*':ti,ab,kw OR 'urin*':ti,ab,kw                                                                                                                                                                                                                                                                                                                                                                                                                                                                                                                                                                                                                                                                                                                                                                                                                                                                                                                                                                                                                                                                                                                                                                                                                                                                                                                                                                                                                                                                                                                                                                                                                                                                                                                                                                                                                                                                                                                                                                                                                                                                                                                                                                                                                                                                                                                                                                                                                                                                                                                                                                                                                                                                                                                                                                                                                                                                                                                                                                                                                                                                                                                                                                                                                                                                                                                                                                                                                                                                                                                                                                                                                                                                                                                                                                                                                                                                                                                                                                                                                                                                                                                                                                                                                                                                                                                                                                                                                                                                                                                                                                                                                                                                                                                                                                                                                                                                                                                                                                                                                                                                                                                                                                                                                                                                                                                                                                                                                                                                                                                                                                                                                                                                                                                                                                                                                                                                                                                                                                                                                | 6345741 |
| #6  | 'cytokine'/exp OR 'orphan nuclear receptor'/exp OR 'cytokine receptor'/exp OR 'adipogenesis inhibitory factor*':ti,ab,kw OR 'amcf i':ti,ab,kw OR 'antiheparin factor*':ti,ab,kw OR 'autocrine motility factor*':ti,ab,kw OR 'apo 1 antigen*':ti,ab,kw OR 'b cell differentiation factor*':ti,ab,kw OR 'b cell growth factor*':ti,ab,kw OR 'b cell proliferating factor*':ti,ab,kw OR 'b cell stimulatory factor*':ti,ab,kw OR 'beta 2 thromboglobulin':ti,ab,kw OR 'beta thromboglobulin':ti,ab,kw OR 'bsf 1':ti,ab,kw OR 'bsf 2':ti,ab,kw OR 'b cell activating factor*':ti,ab,kw OR 'b cell maturation protein a':ti,ab,kw OR 'b lymphocyte activating factor*':ti,ab,kw OR 'b lymphocyte stimulator':ti,ab,kw OR 'betac interleukin receptor subunit':ti,ab,kw OR 'br3 b cell activation factor receptor':ti,ab,kw OR 'b cell maturation antigen*':ti,ab,kw OR 'baff ligand*':ti,ab,kw OR 'baff receptor*':ti,ab,kw OR 'bcgf':ti,ab,kw OR 'bcma protein*':ti,ab,kw OR 'ber h2 antigen*':ti,ab,kw OR 'blys protein*':ti,ab,kw OR 'chemotactic factor*':ti,ab,kw OR 'chemotactic peptid*':ti,ab,kw OR 'colony stimulating factor*':ti,ab,kw OR 'csif 10':ti,ab,kw OR 'ctla 8':ti,ab,kw OR 'cytotoxic t lymphocyte associated antigen':ti,ab,kw OR 'cd 127':ti,ab,kw OR 'cd1341 protein':ti,ab,kw OR 'cd271 protein':ti,ab,kw OR 'cd951':ti,ab,kw OR 'csf2rb receptor':ti,ab,kw OR 'cytokine receptor gp130':ti,ab,kw OR 'c fms protein*':ti,ab,kw OR 'c kit protein*':ti,ab,kw OR 'c kit receptor*':ti,ab,kw OR 'catabolin*':ti,ab,kw OR 'ccl1*':ti,ab,kw OR 'ccl2*':ti,ab,kw OR 'ccl3*':ti,ab,kw OR 'ccl4':ti,ab,kw OR 'ccl5':ti,ab,kw OR 'ccl7':ti,ab,kw OR 'ccl8':ti,ab,kw OR 'ccr':ti,ab,kw OR 'ccr1*':ti,ab,kw OR 'ccr2':ti,ab,kw OR 'ccr3':ti,ab,kw OR 'ccr4':ti,ab,kw OR 'ccr5':ti,ab,kw OR 'ccr6':ti,ab,kw OR 'ccr7':ti,ab,kw OR 'ccr8':ti,ab,kw OR 'cd115 antigen*':ti,ab,kw OR 'cd116 antigen*':ti,ab,kw OR 'cd117 antigen*':ti,ab,kw OR 'cd118 antigen*':ti,ab,kw OR 'cd127':ti,ab,kw OR 'cd130 antigen*':ti,ab,kw OR 'cd131 antigen*':ti,ab,kw OR 'cd134 antigen*':ti,ab,kw OR 'cd134 ligand*':ti,ab,kw OR 'cd137 ligand*':ti,ab,kw OR 'cd153 antigen*':ti,ab,kw OR 'cd154 antigen*':ti,ab,kw OR 'cd178 antigen*':ti,ab,kw OR 'cd254 antigen*':ti,ab,kw OR 'cd257 antigen*':ti,ab,kw OR 'cd265 antigen*':ti,ab,kw OR 'cd266 antigen*':ti,ab,kw OR 'cd267 antigen*':ti,ab,kw OR 'cd268 antigen*':ti,ab,kw OR 'cd27 ligand*':ti,ab,kw OR 'cd30 antigen*':ti,ab,kw OR 'cd30 ligand*':ti,ab,kw OR 'cd357 antigen*':ti,ab,kw OR 'cd40 antigen*':ti,ab,kw OR 'cd40 ligand*':ti,ab,kw OR 'cd401':ti,ab,kw OR 'cd70 antigen*':ti,ab,kw OR 'cd95 antigen*':ti,ab,kw OR 'cd95 ligand*':ti,ab,kw OR 'cdw40 antigen*':ti,ab,kw OR 'chemokine*':ti,ab,kw OR 'chemokine*':ti,ab,kw OR 'csf 1 receptor*':ti,ab,kw OR 'csf receptor*':ti,ab,kw OR 'ctla8':ti,ab,kw OR 'cx3c':ti,ab,kw OR 'cxcl8':ti,ab,kw OR 'cxcr':ti,ab,kw OR 'cxcr3':ti,ab,kw OR 'cxcr4':ti,ab,kw OR 'cxcr5':ti,ab,kw OR 'cxcr6':ti,ab,kw OR 'cytokin*':ti,ab,kw OR 'eosinophil differentiation factor':ti,ab,kw OR 'epidermal cell derived thymocyte activating factor':ti,ab,kw OR 'erythrocyte burst promoting factor':ti,ab,kw OR 'enbrel':ti,ab,kw OR 'erelzi':ti,ab,kw OR 'ectodysplasin*':ti,ab,kw OR 'erythropoietin receptor*':ti,ab,kw OR 'erythropoietin*':ti,ab,kw OR 'etanercept':ti,ab,kw OR 'fas antigen*':ti,ab,kw OR 'fas cell surface death receptor*':ti,ab,kw OR 'fas ligand*':ti,ab,kw OR 'fas receptor*':ti,ab,kw OR 'fasl protein*':ti,ab,kw OR 'fms proto oncogene protein*':ti,ab,kw OR 'fn14 receptor*':ti,ab,kw OR 'gamma thromboglobulin':ti,ab,kw OR 'gdf 15':ti,ab,kw OR 'growth and development factor':ti,ab,kw OR 'growth differentiation factor 15':ti,ab,kw OR 'gp130 signal transducer':ti,ab,kw OR 'g csf receptor*':ti,ab,kw OR 'glucocorticoid induced tnf related protein*':ti,ab,kw OR 'gm csf receptor*':ti,ab,kw OR 'gp130 transducing protein*':ti,ab,kw OR 'heparin neutralizing protein':ti,ab,kw OR 'heparin neutralizing proteins':ti,ab,kw OR 'hepatocyte growth factor':ti,ab,kw OR 'hepatocyte stimulating factor':ti,ab,kw OR 'hybridoma growth factor':ti,ab,kw OR 'hematopoieti*':ti,ab,kw OR 'hematopoietin*':ti,ab,kw OR 'ifn beta 2':ti,ab,kw OR 'ifn gamma inducing factor':ti,ab,kw OR 'il 1':ti,ab,kw OR 'il 10':ti,ab,kw OR 'il 11':ti,ab,kw OR 'il 12':ti,ab,kw OR 'il 12p35':ti,ab,kw OR 'il 12p40':ti,ab,kw OR 'il 13':ti,ab,kw OR 'il 15':ti,ab,kw OR 'il 16':ti,ab,kw OR 'il 17':ti,ab,kw OR 'il 17a':ti,ab,kw OR 'il 17b':ti,ab,kw OR 'il 17c':ti,ab,kw OR 'il 17d':ti,ab,kw OR 'il 17e':ti,ab,kw OR 'il 17f':ti,ab,kw OR 'il 18':ti,ab,kw OR 'il 1ra':ti,ab,kw OR 'il 23 p19':ti,ab,kw OR 'il 23':ti,ab,kw OR 'il 23p19':ti,ab,kw OR 'il 3':ti,ab,kw OR 'il 4':ti,ab,kw OR 'il 5':ti,ab,kw OR 'il 6':ti,ab,kw OR 'il 7':ti,ab,kw OR 'il 8':ti,ab,kw OR 'il 9':ti,ab,kw OR 'il6st gp130':ti,ab,kw OR 'il11':ti,ab,kw OR 'il110':ti,ab,kw OR 'il111':ti,ab,kw OR 'il112':ti,ab,kw OR 'il113':ti,ab,kw OR 'il115':ti,ab,kw OR 'il116':ti,ab,kw OR 'il117':ti,ab,kw OR 'il117a':ti,ab,kw OR 'il117b':ti,ab,kw OR 'il117c':ti,ab,kw OR 'il117d':ti,ab,kw OR 'il117e':ti,ab,kw OR 'il117f':ti,ab,kw OR 'il118':ti,ab,kw OR 'il123':ti,ab,kw OR 'il3':ti,ab,kw OR 'il4':ti,ab,kw OR 'il5':ti,ab,kw OR 'il6':ti,ab,kw OR 'il7':ti,ab,kw OR 'il8':ti,ab,kw OR 'il9':ti,ab,kw OR 'interferon*':ti,ab,kw OR 'interleukin*':ti,ab,kw OR 'kit ligand':ti,ab,kw OR 'lcf factor':ti,ab,kw OR 'ki 1 antigen*':ti,ab,kw OR 'kit proto oncogene protein*':ti,ab,kw OR 'lymphocyte activating factor':ti,ab,kw OR 'lymphocyte chemoattractant factor':ti,ab,kw OR 'lymphocyte mitogenic factor':ti,ab,kw OR 'lymphopietin 1':ti,ab,kw OR 'leukemia inhibitory factor oncostatin m shared receptor':ti,ab,kw OR 'leukemia inhibitory factor receptor':ti,ab,kw OR 'lin':ti,ab,kw OR 'lin+':ti,ab,kw OR 'lif receptor*':ti,ab,kw OR 'lineage negative':ti,ab,kw OR 'lymphokine*':ti,ab,kw OR 'lymphotoxin*':ti,ab,kw OR 'macrophage cell factor':ti,ab,kw OR 'macrophage granulocyte inducer':ti,ab,kw OR 'macrophage inflammatory | 2048571 |

|    |                                                                                                                                                                                                                                                                                                                                                                                                                                                                                                                                                                                                                                                                                                                                                                                                                                                                                                                                                                                                                                                                                                                                                                                                                                                                                                                                                                                                                                                                                                                                                                                                                                                                                                                                                                                                                                                                                                                                                                                                                                                                                                                                                                                                                                                                                                                                                                                                                                                                                                                                                                                                                                                                                                                                                                                                                                                                                                                                                                                                                                                                                                                                                                                                                                                                                                                                                                                                                                                                                                                                                                                                    |         |
|----|----------------------------------------------------------------------------------------------------------------------------------------------------------------------------------------------------------------------------------------------------------------------------------------------------------------------------------------------------------------------------------------------------------------------------------------------------------------------------------------------------------------------------------------------------------------------------------------------------------------------------------------------------------------------------------------------------------------------------------------------------------------------------------------------------------------------------------------------------------------------------------------------------------------------------------------------------------------------------------------------------------------------------------------------------------------------------------------------------------------------------------------------------------------------------------------------------------------------------------------------------------------------------------------------------------------------------------------------------------------------------------------------------------------------------------------------------------------------------------------------------------------------------------------------------------------------------------------------------------------------------------------------------------------------------------------------------------------------------------------------------------------------------------------------------------------------------------------------------------------------------------------------------------------------------------------------------------------------------------------------------------------------------------------------------------------------------------------------------------------------------------------------------------------------------------------------------------------------------------------------------------------------------------------------------------------------------------------------------------------------------------------------------------------------------------------------------------------------------------------------------------------------------------------------------------------------------------------------------------------------------------------------------------------------------------------------------------------------------------------------------------------------------------------------------------------------------------------------------------------------------------------------------------------------------------------------------------------------------------------------------------------------------------------------------------------------------------------------------------------------------------------------------------------------------------------------------------------------------------------------------------------------------------------------------------------------------------------------------------------------------------------------------------------------------------------------------------------------------------------------------------------------------------------------------------------------------------------------------|---------|
|    | protein*:ti,ab,kw OR 'macrophage inflammatory proteins*:ti,ab,kw OR 'mast cell growth factor*:ti,ab,kw OR 'mcgf 2*:ti,ab,kw OR 'mgdf factor*:ti,ab,kw OR 'mgi 1*:ti,ab,kw OR 'mgi 2*:ti,ab,kw OR 'monocyte chemotactic proteins*:ti,ab,kw OR 'mpl ligand*:ti,ab,kw OR 'myeloid cell growth inducer*:ti,ab,kw OR 'myeloid differentiation inducing protein*:ti,ab,kw OR 'myeloproliferative leukemia virus oncogene ligand*:ti,ab,kw OR 'm csf receptor*:ti,ab,kw OR 'monocyte chemoattractant protein*:ti,ab,kw OR 'monocyte chemotactic protein*:ti,ab,kw OR 'natural killer cell stimulatory factor*:ti,ab,kw OR 'neutrophil activating peptide*:ti,ab,kw OR 'neutrophil activation factor*:ti,ab,kw OR 'nf kappa b receptor activator*:ti,ab,kw OR 'nf kappa b receptor activator*:ti,ab,kw OR 'p cell stimulating factor*:ti,ab,kw OR 'oncostatin m leukemia inhibitory factor shared receptor*:ti,ab,kw OR 'oncostatin m receptor beta*:ti,ab,kw OR 'oncostatin m type i receptor*:ti,ab,kw OR 'oncostatin m type ii receptor*:ti,ab,kw OR 'osteoclast differentiation factor*:ti,ab,kw OR 'opgl protein*:ti,ab,kw OR 'osm lif receptor*:ti,ab,kw OR 'osteoprotegerin ligand*:ti,ab,kw OR 'ox40 ligand*:ti,ab,kw OR 'ox40 receptor*:ti,ab,kw OR 'ox40l protein*:ti,ab,kw OR 'plasmacytoma growth factor*:ti,ab,kw OR 'prostate differentiation factor*:ti,ab,kw OR 'protein inducer mgi*:ti,ab,kw OR 'p145 c kit*:ti,ab,kw OR 'p145c kit*:ti,ab,kw OR 'proto oncogene protein c kit*:ti,ab,kw OR 'proto oncogene protein fms*:ti,ab,kw OR 'proto oncogene protein kit*:ti,ab,kw OR 'proto oncogene proteins c kit*:ti,ab,kw OR 'recombinant g csf*:ti,ab,kw OR 'recombinant gm csf*:ti,ab,kw OR 'ro 23 6019*:ti,ab,kw OR 'ro 236019*:ti,ab,kw OR 'ru 49637*:ti,ab,kw OR 'rankl*:ti,ab,kw OR 'receptor activator of nf kappa b*:ti,ab,kw OR 'receptor activator of nf kappa b*:ti,ab,kw OR 'receptor activator of nuclear factor kappa b*:ti,ab,kw OR 'rank ligand*:ti,ab,kw OR 'recombinant human dimeric tnf receptor type ii igg fusion protein*:ti,ab,kw OR 'ro236019*:ti,ab,kw OR 'ru49637*:ti,ab,kw OR 'scatter factor*:ti,ab,kw OR 'steel factor*:ti,ab,kw OR 'stem cell factor*:ti,ab,kw OR 'sgp130*:ti,ab,kw OR 'signal transducer gp130*:ti,ab,kw OR 'signal transducing receptor gp130*:ti,ab,kw OR 'soluble glycoprotein 130*:ti,ab,kw OR 'soluble gp130*:ti,ab,kw OR 'scf receptor*:ti,ab,kw OR 'stem cell factor receptor*:ti,ab,kw OR 't cell growth factor*:ti,ab,kw OR 't cell replacing factor*:ti,ab,kw OR 't cell stimulating factor*:ti,ab,kw OR 't helper factor*:ti,ab,kw OR 'thrombocytopoiesis stimulating factor*:ti,ab,kw OR 'thymocyte stimulating factor*:ti,ab,kw OR 't b cell activating molecule*:ti,ab,kw OR 't cell gp39 antigen*:ti,ab,kw OR 'tall 1 protein*:ti,ab,kw OR 'tnfr fc fusion protein*:ti,ab,kw OR 'tnfrsf11a protein*:ti,ab,kw OR 'tnfrsf5 receptor*:ti,ab,kw OR 'tnfrsf8 receptor*:ti,ab,kw OR 'tnfrsf13b*:ti,ab,kw OR 'tnr 001*:ti,ab,kw OR 'tnr001*:ti,ab,kw OR 'tntr fc*:ti,ab,kw OR 'trance protein*:ti,ab,kw OR 'trance r*:ti,ab,kw OR 'transmembrane activator and caml interactor protein*:ti,ab,kw OR 'tweakr*:ti,ab,kw OR 'taci receptor*:ti,ab,kw OR 'tcgf*:ti,ab,kw OR 'thank protein*:ti,ab,kw OR 'thrombopoietin*:ti,ab,kw OR 'thrombopoietin*:ti,ab,kw OR 'tnfrsf6 receptor*:ti,ab,kw OR 'tnt receptor fusion protein*:ti,ab,kw OR 'trance receptor*:ti,ab,kw OR 'tweak receptor*:ti,ab,kw OR 'transforming growth factor*:ti,ab,kw OR 'tumor necrosis factor*:ti,ab,kw OR '4 1bb ligand*:ti,ab,kw OR '4 1bbl protein*:ti,ab,kw |         |
| #5 | 'blood cell*/exp OR 'blood cell*:ti,ab,kw OR 'thrombocyt*:ti,ab,kw OR 'platelet*:ti,ab,kw OR 'erythrocyt*:ti,ab,kw OR 'hemocyt*:ti,ab,kw OR 'leukocyt*:ti,ab,kw OR 'reticulocyt*:ti,ab,kw OR 'granulocyt*:ti,ab,kw OR 'mononuclear cell*:ti,ab,kw OR 'stem cell*:ti,ab,kw OR 'progenitor cell*:ti,ab,kw OR 'mother cell*:ti,ab,kw OR 'colony forming*:ti,ab,kw OR 'basophil*:ti,ab,kw OR 'eosinophil*:ti,ab,kw OR 'neutrophil*:ti,ab,kw OR 'lymphocyt*:ti,ab,kw OR 'monocyt*:ti,ab,kw OR 'killer cell*:ti,ab,kw OR 'nk cell*:ti,ab,kw OR 'precursor cell*:ti,ab,kw OR 'suppressor cell*:ti,ab,kw OR 'myelocyt*:ti,ab,kw OR 'myeloblast*:ti,ab,kw OR 'b-cell*:ti,ab,kw OR 't-cell*:ti,ab,kw OR 't helper cel*:ti,ab,kw OR 'treg*:ti,ab,kw OR 'macrophage*:ti,ab,kw OR 'myeloid cell*:ti,ab,kw OR 'dendritic cell*:ti,ab,kw OR 'antigen-presenting cell*:ti,ab,kw OR 'immune cell*:ti,ab,kw OR 'inflammatory cell*:ti,ab,kw OR 'cd4*:ti,ab,kw OR 'cd8*:ti,ab,kw                                                                                                                                                                                                                                                                                                                                                                                                                                                                                                                                                                                                                                                                                                                                                                                                                                                                                                                                                                                                                                                                                                                                                                                                                                                                                                                                                                                                                                                                                                                                                                                                                                                                                                                                                                                                                                                                                                                                                                                                                                                                                                                                                                                                                                                                                                                                                                                                                                                                                                                                                                                                                                      | 3208435 |
| #4 | 'microparticle*:ti,ab,kw OR 'microvesicle*:ti,ab,kw OR 'exosome*:ti,ab,kw OR 'ectosome*:ti,ab,kw OR 'extracellular vesicle*:ti,ab,kw OR 'exovesicle*:ti,ab,kw OR 'apoptotic bod*:ti,ab,kw                                                                                                                                                                                                                                                                                                                                                                                                                                                                                                                                                                                                                                                                                                                                                                                                                                                                                                                                                                                                                                                                                                                                                                                                                                                                                                                                                                                                                                                                                                                                                                                                                                                                                                                                                                                                                                                                                                                                                                                                                                                                                                                                                                                                                                                                                                                                                                                                                                                                                                                                                                                                                                                                                                                                                                                                                                                                                                                                                                                                                                                                                                                                                                                                                                                                                                                                                                                                          | 64493   |
| #3 | 'microna*/exp OR 'microna*:ti,ab,kw OR 'micro rna*:ti,ab,kw OR 'mirna*:ti,ab,kw OR 'pri-mirna*:ti,ab,kw OR 'strna*:ti,ab,kw OR 'small temporal rna*:ti,ab,kw OR 'pre-mirna*:ti,ab,kw OR 'lncrna*:ti,ab,kw OR 'non-coding rna*:ti,ab,kw OR 'noncoding rna*:ti,ab,kw OR 'ncrna*:ti,ab,kw                                                                                                                                                                                                                                                                                                                                                                                                                                                                                                                                                                                                                                                                                                                                                                                                                                                                                                                                                                                                                                                                                                                                                                                                                                                                                                                                                                                                                                                                                                                                                                                                                                                                                                                                                                                                                                                                                                                                                                                                                                                                                                                                                                                                                                                                                                                                                                                                                                                                                                                                                                                                                                                                                                                                                                                                                                                                                                                                                                                                                                                                                                                                                                                                                                                                                                             | 209930  |
| #2 | 'biological marker*/exp OR 'biomarker*:ti,ab,kw OR 'marker*:ti,ab,kw OR 'indicator*:ti,ab,kw                                                                                                                                                                                                                                                                                                                                                                                                                                                                                                                                                                                                                                                                                                                                                                                                                                                                                                                                                                                                                                                                                                                                                                                                                                                                                                                                                                                                                                                                                                                                                                                                                                                                                                                                                                                                                                                                                                                                                                                                                                                                                                                                                                                                                                                                                                                                                                                                                                                                                                                                                                                                                                                                                                                                                                                                                                                                                                                                                                                                                                                                                                                                                                                                                                                                                                                                                                                                                                                                                                       | 1876051 |
| #1 | 'pulmonary arterial hypertens*:ti,ab,kw OR 'pulmonary artery hypertens*:ti,ab,kw OR 'idiopathic pulmonary hypertens*:ti,ab,kw OR 'primary pulmonary hypertens*:ti,ab,kw OR 'heritable pulmonary hypertens*:ti,ab,kw OR 'hereditary pulmonary hypertens*:ti,ab,kw                                                                                                                                                                                                                                                                                                                                                                                                                                                                                                                                                                                                                                                                                                                                                                                                                                                                                                                                                                                                                                                                                                                                                                                                                                                                                                                                                                                                                                                                                                                                                                                                                                                                                                                                                                                                                                                                                                                                                                                                                                                                                                                                                                                                                                                                                                                                                                                                                                                                                                                                                                                                                                                                                                                                                                                                                                                                                                                                                                                                                                                                                                                                                                                                                                                                                                                                   | 28468   |

Clarivate Analytics/ Web of Science Core Collection 976 results (28 January, 2021)

| Set | Result                                                                                                                                |         |
|-----|---------------------------------------------------------------------------------------------------------------------------------------|---------|
| #8  | #1 AND #2 AND (#3 OR #4 OR #5 OR #6 OR #7)<br><i>Indexes=SCI-EXPANDED, SSCI, A&amp;HCI, ESCI Timespan=All years</i>                   | 976     |
| #7  | TS=(“blood*” OR “plasma*” OR “serum*” OR “sera*” OR “urin”*)<br><i>Indexes=SCI-EXPANDED, SSCI, A&amp;HCI, ESCI Timespan=All years</i> | 4312314 |

|     |                                                                                                                                                                                                                                                                                                                                                                                                                                                                                                                                                                                                                                                                                                                                                                                                                                                                                                                                                                                                                                                                                                                                                                                                                                                                                                                                                                                                                                                                                                                                                                                                                                                                                                                                                                                                                                                                                                                                                                                                                                                                                                                                                                                                                                                                                                                                                                                                                                                                                                                                                                                                                                                                                                                                                                                                                                                                                                                                                                                                                                                                                                                                                                                                                                                                                                                                                                                                                                                                                                                                                                                                                                                                                                                                                                                                                                                                                                                                                                                                                                                                                                                                                                                                                                                                                                                                                                                                                                                                                                                                                                                                                                                                                                                                                                                                                                                                                                                                                                                                                                                                                                                                                                                                                                                                                                                                                                                                                                                                                                                                                                                                                                                                                                                                                                                                                                                                                                                                                                                                                                                                                                                                                                                                                                                                                                                                                                                                                                                                                                                                                                                                                                                                                                                                                                                                                                                                                                                                               |         |
|-----|-----------------------------------------------------------------------------------------------------------------------------------------------------------------------------------------------------------------------------------------------------------------------------------------------------------------------------------------------------------------------------------------------------------------------------------------------------------------------------------------------------------------------------------------------------------------------------------------------------------------------------------------------------------------------------------------------------------------------------------------------------------------------------------------------------------------------------------------------------------------------------------------------------------------------------------------------------------------------------------------------------------------------------------------------------------------------------------------------------------------------------------------------------------------------------------------------------------------------------------------------------------------------------------------------------------------------------------------------------------------------------------------------------------------------------------------------------------------------------------------------------------------------------------------------------------------------------------------------------------------------------------------------------------------------------------------------------------------------------------------------------------------------------------------------------------------------------------------------------------------------------------------------------------------------------------------------------------------------------------------------------------------------------------------------------------------------------------------------------------------------------------------------------------------------------------------------------------------------------------------------------------------------------------------------------------------------------------------------------------------------------------------------------------------------------------------------------------------------------------------------------------------------------------------------------------------------------------------------------------------------------------------------------------------------------------------------------------------------------------------------------------------------------------------------------------------------------------------------------------------------------------------------------------------------------------------------------------------------------------------------------------------------------------------------------------------------------------------------------------------------------------------------------------------------------------------------------------------------------------------------------------------------------------------------------------------------------------------------------------------------------------------------------------------------------------------------------------------------------------------------------------------------------------------------------------------------------------------------------------------------------------------------------------------------------------------------------------------------------------------------------------------------------------------------------------------------------------------------------------------------------------------------------------------------------------------------------------------------------------------------------------------------------------------------------------------------------------------------------------------------------------------------------------------------------------------------------------------------------------------------------------------------------------------------------------------------------------------------------------------------------------------------------------------------------------------------------------------------------------------------------------------------------------------------------------------------------------------------------------------------------------------------------------------------------------------------------------------------------------------------------------------------------------------------------------------------------------------------------------------------------------------------------------------------------------------------------------------------------------------------------------------------------------------------------------------------------------------------------------------------------------------------------------------------------------------------------------------------------------------------------------------------------------------------------------------------------------------------------------------------------------------------------------------------------------------------------------------------------------------------------------------------------------------------------------------------------------------------------------------------------------------------------------------------------------------------------------------------------------------------------------------------------------------------------------------------------------------------------------------------------------------------------------------------------------------------------------------------------------------------------------------------------------------------------------------------------------------------------------------------------------------------------------------------------------------------------------------------------------------------------------------------------------------------------------------------------------------------------------------------------------------------------------------------------------------------------------------------------------------------------------------------------------------------------------------------------------------------------------------------------------------------------------------------------------------------------------------------------------------------------------------------------------------------------------------------------------------------------------------------------------------------------------------------------------------------|---------|
| #6  | <p>TS=(“adipogenesis inhibitory factor*” OR “amcf i*” OR “antiheparin factor*” OR “autocrine motility factor*” OR “apo 1 antigen*” OR “b cell differentiation factor*” OR “b cell growth factor*” OR “b cell proliferating factor*” OR “b cell stimulatory factor*” OR “beta 2 thromboglobulin” OR “beta thromboglobulin” OR “bsf 1” OR “bsf 2” OR “b cell activating factor*” OR “b cell maturation protein a” OR “b lymphocyte activating factor*” OR “b lymphocyte stimulator” OR “betac interleukin receptor subunit” OR “br3 b cell activation factor receptor” OR “b cell maturation antigen*” OR “baff ligand*” OR “baff receptor*” OR “bcgf” OR “bcm protein*” OR “ber h2 antigen*” OR “blys protein*” OR “chemotactic factor*” OR “chemotactic peptid*” OR “colony stimulating factor*” OR “csif 10” OR “ctla 8” OR “cytotoxic t lymphocyte associated antigen” OR “cd 127” OR “cd 1341 protein” OR “cd271 protein” OR “cd951” OR “csf2rb receptor” OR “cytokine receptor gp130” OR “c fms protein*” OR “c kit protein*” OR “c kit receptor*” OR “catabolin*” OR “ccl1*” OR “ccl2*” OR “ccl3*” OR “ccl4” OR “ccl5” OR “ccl7” OR “ccl8” OR “ccr” OR “ccr1*” OR “ccr2” OR “ccr3” OR “ccr4” OR “ccr5” OR “ccr6” OR “ccr7” OR “ccr8” OR “cd115 antigen*” OR “cd116 antigen*” OR “cd117 antigen*” OR “cd118 antigen*” OR “cd127” OR “cd130 antigen*” OR “cd131 antigen*” OR “cd134 antigen*” OR “cd134 ligand*” OR “cd137 ligand*” OR “cd153 antigen*” OR “cd154 antigen*” OR “cd178 antigen*” OR “cd254 antigen*” OR “cd257 antigen*” OR “cd265 antigen*” OR “cd266 antigen*” OR “cd267 antigen*” OR “cd268 antigen*” OR “cd27 ligand*” OR “cd30 antigen*” OR “cd30 ligand*” OR “cd357 antigen*” OR “cd40 antigen*” OR “cd40 ligand*” OR “cd40l” OR “cd70 antigen*” OR “cd95 antigen*” OR “cd95 ligand*” OR “cdw40 antigen*” OR “chemokin*” OR “chemokine*” OR “csf 1 receptor*” OR “csf receptor*” OR “ctla8” OR “cx3c” OR “cxcl8” OR “cxcr” OR “cxcr3” OR “cxcr4” OR “cxcr5” OR “cxcr6” OR “cytokin*” OR “eosinophil differentiation factor” OR “epidermal cell derived thymocyte activating factor” OR “erythrocyte burst promoting factor” OR “enbrel” OR “erelzi” OR “ectodysplasin*” OR “erythropoietin receptor*” OR “erythropoietin*” OR “etanercept” OR “fas antigen*” OR “fas cell surface death receptor*” OR “fas ligand*” OR “fas receptor*” OR “fasl protein*” OR “fms proto oncogene protein*” OR “fn14 receptor*” OR “gamma thromboglobulin” OR “gdf 15” OR “growth and development factor” OR “growth differentiation factor 15” OR “gp130 signal transducer” OR “g csf receptor*” OR “glucocorticoid induced tnfr related protein*” OR “gm csf receptor*” OR “gp130 transducing protein*” OR “heparin neutralizing protein” OR “heparin neutralizing proteins” OR “hepatocyte growth factor” OR “hepatocyte stimulating factor” OR “hybridoma growth factor” OR “hematopoieti*” OR “hepatopoietin*” OR “ifn beta 2” OR “ifn gamma inducing factor” OR “il 1” OR “il 10” OR “il 11” OR “il 12” OR “il 12p35” OR “il 12p40” OR “il 13” OR “il 15” OR “il 16” OR “il 17” OR “il 17a” OR “il 17b” OR “il 17c” OR “il 17d” OR “il 17e” OR “il 17f” OR “il 18” OR “il 1ra” OR “il 23 p19” OR “il 23” OR “il 23p19” OR “il 3” OR “il 4” OR “il 5” OR “il 6” OR “il 7” OR “il 8” OR “il 9” OR “il6st gp130” OR “il1” OR “il10” OR “il11” OR “il12” OR “il13” OR “il15” OR “il16” OR “il17” OR “il17a” OR “il17b” OR “il17c” OR “il17d” OR “il17e” OR “il17f” OR “il18” OR “il23” OR “il23” OR “il4” OR “il4” OR “il4” OR “il5” OR “il6” OR “il6” OR “il8” OR “il8” OR “il9” OR “interferon*” OR “interleukin*” OR “kit ligand” OR “lef factor” OR “ki 1 antigen*” OR “kit proto oncogene protein*” OR “lymphocyte activating factor” OR “lymphocyte chemoattractant factor” OR “lymphocyte mitogenic factor” OR “lymphopoietin 1” OR “leukemia inhibitory factor oncostatin m shared receptor” OR “leukemia inhibitory factor receptor” OR “lin” OR “lin+” OR “lif receptor*” OR “lineage negative” OR “lymphokine*” OR “lymphotoxin*” OR “macrophage cell factor” OR “macrophage granulocyte inducer” OR “macrophage inflammatory protein” OR “macrophage inflammatory proteins” OR “mast cell growth factor” OR “mcgf 2” OR “mgdf factor” OR “mgi 1” OR “mgi 2” OR “monocyte chemotactic proteins” OR “mpl ligand” OR “myeloid cell growth inducer” OR “myeloid differentiation inducing protein” OR “myeloproliferative leukemia virus oncogene ligand” OR “m csf receptor*” OR “monocyte chemoattractant protein*” OR “monocyte chemotactic protein*” OR “natural killer cell stimulatory factor*” OR “neutrophil activating peptide” OR “neutrophil activation factor” OR “nf kappa b receptor activator” OR “nf kappa b receptor activator r” OR “p cell stimulating factor” OR “oncostatin m leukemia inhibitory factor shared receptor” OR “oncostatin m receptor beta” OR “oncostatin m type i receptor” OR “oncostatin m type ii receptor” OR “osteoclast differentiation factor” OR “opgl protein” OR “osm lif receptor*” OR “osteoprotegerin ligand*” OR “ox40 ligand*” OR “ox40 receptor*” OR “ox40l protein*” OR “p lasmacytoma growth factor” OR “prostate differentiation factor” OR “protein inducer mgi” OR “p145 c kit” OR “p145c kit” OR “proto oncogene protein c kit” OR “proto oncogene protein fms” OR “proto oncogene protein kit” OR “proto oncogene protein c kit” OR “recombinant g csf” OR “recombinant gm csf” OR “ro 23 6019” OR “ro 236019” OR “ru 49637” OR “rankl” OR “receptor activator of nf kappa b” OR “receptor activator of nf kappa b” OR “receptor activator of nuclear factor kappa b” OR “rank ligand*” OR “recombinant human dimeric tnf receptor type ii igg fusion protein*” OR “ro236019” OR “ru49637” OR “scatter factor” OR “steel factor” OR “stem cell factor” OR “spp130” OR “signal transducer gp130” OR “signal transducing receptor gp130” OR “soluble glycoprotein 130” OR “soluble gp130” OR “scf receptor*” OR “stem cell factor receptor*” OR “t cell l growth factor” OR “t cell replacing factor” OR “t cell stimulating factor” OR “t helper factor” OR “thrombocytopoiesis stimulating factor” OR “thymocyte stimulating factor” OR “t b cell activating molecule” OR “t cell gp39 antigen” OR “tall 1 protein” OR “tnfr fc fusion protein” OR “tnfrsf1a protein” OR “tnfrsf5 receptor” OR “tnfrsf8 receptor” OR “tnfrsf13b” OR “tnr 001” OR “tnr001” OR “tnr fc” OR “trance protein” OR “trance r” OR “transmembrane activator and caml interactor protein” OR “t weakr” OR “taci receptor*” OR “tcgf” OR “thank protein*” OR “thrombocytopoietin*” OR “thrombopoietin*” OR “tnfrsf6 receptor*” OR “tnt receptor fusion protein*” OR “trance receptor*” OR “tweak receptor*” OR “transforming growth factor*” OR “tumor necrosis factor*” OR “4 1bb ligand*” OR “4 1bbl protein*”)</p> <p>Indexes=SCI-EXPANDED, SSCI, A&amp;HCI, ESCI Timespan=All years</p> | 1316499 |
| # 5 | <p>TS=(“blood cell*” OR “thrombocyt*” OR “platelet*” OR “erythrocyt*” OR “hemocyt*” OR “leukocyt*” OR “reticulocyt*” OR “granulocyt*” OR “mononuclear cell*” OR “stem cell*” OR “progenitor cell*” OR “mother cell*” OR “colony forming” OR “basophil*” OR “eosinophil*” OR “neutrophil*” OR “lymphocyt*” OR “monocyt*” OR “killer cell*” OR “nk cell*” OR “pre-ecursor cell*” OR “suppressor cell*” OR “myelocyt*” OR “myeloblast*” OR “B-cell*” OR “T-cell*” OR “T helper cel*” OR “Treg*” OR “macrophage*” OR “myeloid cell*” OR “dendritic cell*” OR “antigen-presenting cell*” OR “immune cell*” OR “inflammatory cell*” OR “CD4” OR “CD8”)</p> <p>Indexes=SCI-EXPANDED, SSCI, A&amp;HCI, ESCI Timespan=All years</p>                                                                                                                                                                                                                                                                                                                                                                                                                                                                                                                                                                                                                                                                                                                                                                                                                                                                                                                                                                                                                                                                                                                                                                                                                                                                                                                                                                                                                                                                                                                                                                                                                                                                                                                                                                                                                                                                                                                                                                                                                                                                                                                                                                                                                                                                                                                                                                                                                                                                                                                                                                                                                                                                                                                                                                                                                                                                                                                                                                                                                                                                                                                                                                                                                                                                                                                                                                                                                                                                                                                                                                                                                                                                                                                                                                                                                                                                                                                                                                                                                                                                                                                                                                                                                                                                                                                                                                                                                                                                                                                                                                                                                                                                                                                                                                                                                                                                                                                                                                                                                                                                                                                                                                                                                                                                                                                                                                                                                                                                                                                                                                                                                                                                                                                                                                                                                                                                                                                                                                                                                                                                                                                                                                                                                    | 2677862 |
| #4  | <p>TS=(“microparticle*” OR “microvesicle*” OR “exosom*” OR “ectosom*” OR “extracellular vesicle*” OR “exovesicle*” OR “apoptotic bod*”)</p> <p>Indexes=SCI-EXPANDED, SSCI, A&amp;HCI, ESCI Timespan=All years</p>                                                                                                                                                                                                                                                                                                                                                                                                                                                                                                                                                                                                                                                                                                                                                                                                                                                                                                                                                                                                                                                                                                                                                                                                                                                                                                                                                                                                                                                                                                                                                                                                                                                                                                                                                                                                                                                                                                                                                                                                                                                                                                                                                                                                                                                                                                                                                                                                                                                                                                                                                                                                                                                                                                                                                                                                                                                                                                                                                                                                                                                                                                                                                                                                                                                                                                                                                                                                                                                                                                                                                                                                                                                                                                                                                                                                                                                                                                                                                                                                                                                                                                                                                                                                                                                                                                                                                                                                                                                                                                                                                                                                                                                                                                                                                                                                                                                                                                                                                                                                                                                                                                                                                                                                                                                                                                                                                                                                                                                                                                                                                                                                                                                                                                                                                                                                                                                                                                                                                                                                                                                                                                                                                                                                                                                                                                                                                                                                                                                                                                                                                                                                                                                                                                                             | 73190   |
| #3  | <p>TS=(“MicroRNA*” OR “Micro RNA*” OR “miRNA*” OR “pri-miRNA*” OR “strRNA*” OR “Small Temporal RNA*” OR “pre-miRNA*” OR “lncRNA*” OR “non-coding RNA*” OR “noncoding RNA*” OR “ncRNA*”)</p> <p>Indexes=SCI-EXPANDED, SSCI, A&amp;HCI, ESCI Timespan=All years</p>                                                                                                                                                                                                                                                                                                                                                                                                                                                                                                                                                                                                                                                                                                                                                                                                                                                                                                                                                                                                                                                                                                                                                                                                                                                                                                                                                                                                                                                                                                                                                                                                                                                                                                                                                                                                                                                                                                                                                                                                                                                                                                                                                                                                                                                                                                                                                                                                                                                                                                                                                                                                                                                                                                                                                                                                                                                                                                                                                                                                                                                                                                                                                                                                                                                                                                                                                                                                                                                                                                                                                                                                                                                                                                                                                                                                                                                                                                                                                                                                                                                                                                                                                                                                                                                                                                                                                                                                                                                                                                                                                                                                                                                                                                                                                                                                                                                                                                                                                                                                                                                                                                                                                                                                                                                                                                                                                                                                                                                                                                                                                                                                                                                                                                                                                                                                                                                                                                                                                                                                                                                                                                                                                                                                                                                                                                                                                                                                                                                                                                                                                                                                                                                                             | 170639  |
| #2  | <p>TS=(“biomarker*” OR “marker*” OR “indicator*”)</p> <p>Indexes=SCI-EXPANDED, SSCI, A&amp;HCI, ESCI Timespan=All years</p>                                                                                                                                                                                                                                                                                                                                                                                                                                                                                                                                                                                                                                                                                                                                                                                                                                                                                                                                                                                                                                                                                                                                                                                                                                                                                                                                                                                                                                                                                                                                                                                                                                                                                                                                                                                                                                                                                                                                                                                                                                                                                                                                                                                                                                                                                                                                                                                                                                                                                                                                                                                                                                                                                                                                                                                                                                                                                                                                                                                                                                                                                                                                                                                                                                                                                                                                                                                                                                                                                                                                                                                                                                                                                                                                                                                                                                                                                                                                                                                                                                                                                                                                                                                                                                                                                                                                                                                                                                                                                                                                                                                                                                                                                                                                                                                                                                                                                                                                                                                                                                                                                                                                                                                                                                                                                                                                                                                                                                                                                                                                                                                                                                                                                                                                                                                                                                                                                                                                                                                                                                                                                                                                                                                                                                                                                                                                                                                                                                                                                                                                                                                                                                                                                                                                                                                                                   | 1719569 |
| # 1 | <p>TS=(“pulmonary arterial hypertens*” OR “pulmonary artery hypertens*” OR “idiopathic pulmonary hypertensi*” OR “primary pulmonary hypertens*” OR “heritable pulmonary hypertensin” OR “hereditary pulmonary hypertens*”)</p> <p>Indexes=SCI-EXPANDED, SSCI, A&amp;HCI, ESCI Timespan=All years</p>                                                                                                                                                                                                                                                                                                                                                                                                                                                                                                                                                                                                                                                                                                                                                                                                                                                                                                                                                                                                                                                                                                                                                                                                                                                                                                                                                                                                                                                                                                                                                                                                                                                                                                                                                                                                                                                                                                                                                                                                                                                                                                                                                                                                                                                                                                                                                                                                                                                                                                                                                                                                                                                                                                                                                                                                                                                                                                                                                                                                                                                                                                                                                                                                                                                                                                                                                                                                                                                                                                                                                                                                                                                                                                                                                                                                                                                                                                                                                                                                                                                                                                                                                                                                                                                                                                                                                                                                                                                                                                                                                                                                                                                                                                                                                                                                                                                                                                                                                                                                                                                                                                                                                                                                                                                                                                                                                                                                                                                                                                                                                                                                                                                                                                                                                                                                                                                                                                                                                                                                                                                                                                                                                                                                                                                                                                                                                                                                                                                                                                                                                                                                                                          | 21537   |

| ID | Search                                                                                                                                                                                                                                                                                                                                                                                                                                                                                                                                                                                                                                                                                                                                                                                                                                                                                                                                                                                                                                                                                                                                                                                                                                                                                                                                                                                                                                                                                                                                                                                                                                                                                                                                                                                                                                                                                                                                                                                                                                                                                                                                                                                                                                                                                                                                                                                                                                                                                                                                                                                                                                                                                                                                                                                                                                                                                                                                                                                                                                                                                                                                                                                                                                                                                                                                                                                                                                                                                                                                                                                                                                                                                                                                                                                                                                                                                                                                                                                                                                                                                                                                                                                                                                                                                                                                                                                                                                                                                                                                                                                                                                                                                                                                                                                                                                                                                                                                                                                                                                                                                                                                                                                                                                                                                                                                                                                                                                                                                                                                                                                                                                                                                                                                                                                                                                                                                                                                                                                                                                                                                                                                                                                                                                                                                                                                                                                                                                                                                                                                                                                                                                                                                                                                                                                                                                                                                                                                                                                                                                                                                                                                                                                            | Hits   |
|----|---------------------------------------------------------------------------------------------------------------------------------------------------------------------------------------------------------------------------------------------------------------------------------------------------------------------------------------------------------------------------------------------------------------------------------------------------------------------------------------------------------------------------------------------------------------------------------------------------------------------------------------------------------------------------------------------------------------------------------------------------------------------------------------------------------------------------------------------------------------------------------------------------------------------------------------------------------------------------------------------------------------------------------------------------------------------------------------------------------------------------------------------------------------------------------------------------------------------------------------------------------------------------------------------------------------------------------------------------------------------------------------------------------------------------------------------------------------------------------------------------------------------------------------------------------------------------------------------------------------------------------------------------------------------------------------------------------------------------------------------------------------------------------------------------------------------------------------------------------------------------------------------------------------------------------------------------------------------------------------------------------------------------------------------------------------------------------------------------------------------------------------------------------------------------------------------------------------------------------------------------------------------------------------------------------------------------------------------------------------------------------------------------------------------------------------------------------------------------------------------------------------------------------------------------------------------------------------------------------------------------------------------------------------------------------------------------------------------------------------------------------------------------------------------------------------------------------------------------------------------------------------------------------------------------------------------------------------------------------------------------------------------------------------------------------------------------------------------------------------------------------------------------------------------------------------------------------------------------------------------------------------------------------------------------------------------------------------------------------------------------------------------------------------------------------------------------------------------------------------------------------------------------------------------------------------------------------------------------------------------------------------------------------------------------------------------------------------------------------------------------------------------------------------------------------------------------------------------------------------------------------------------------------------------------------------------------------------------------------------------------------------------------------------------------------------------------------------------------------------------------------------------------------------------------------------------------------------------------------------------------------------------------------------------------------------------------------------------------------------------------------------------------------------------------------------------------------------------------------------------------------------------------------------------------------------------------------------------------------------------------------------------------------------------------------------------------------------------------------------------------------------------------------------------------------------------------------------------------------------------------------------------------------------------------------------------------------------------------------------------------------------------------------------------------------------------------------------------------------------------------------------------------------------------------------------------------------------------------------------------------------------------------------------------------------------------------------------------------------------------------------------------------------------------------------------------------------------------------------------------------------------------------------------------------------------------------------------------------------------------------------------------------------------------------------------------------------------------------------------------------------------------------------------------------------------------------------------------------------------------------------------------------------------------------------------------------------------------------------------------------------------------------------------------------------------------------------------------------------------------------------------------------------------------------------------------------------------------------------------------------------------------------------------------------------------------------------------------------------------------------------------------------------------------------------------------------------------------------------------------------------------------------------------------------------------------------------------------------------------------------------------------------------------------------------------------------------------------------------------------------------------------------------------------------------------------------------------------------------------------------------------------------------------------------------------------------------------------------------------------------------------------------------------------------------------------------------------------------------------------------------------------------------------------------------------------------|--------|
| #8 | #1 AND #2 AND (#3 OR #4 OR #5 OR #6 OR #7)                                                                                                                                                                                                                                                                                                                                                                                                                                                                                                                                                                                                                                                                                                                                                                                                                                                                                                                                                                                                                                                                                                                                                                                                                                                                                                                                                                                                                                                                                                                                                                                                                                                                                                                                                                                                                                                                                                                                                                                                                                                                                                                                                                                                                                                                                                                                                                                                                                                                                                                                                                                                                                                                                                                                                                                                                                                                                                                                                                                                                                                                                                                                                                                                                                                                                                                                                                                                                                                                                                                                                                                                                                                                                                                                                                                                                                                                                                                                                                                                                                                                                                                                                                                                                                                                                                                                                                                                                                                                                                                                                                                                                                                                                                                                                                                                                                                                                                                                                                                                                                                                                                                                                                                                                                                                                                                                                                                                                                                                                                                                                                                                                                                                                                                                                                                                                                                                                                                                                                                                                                                                                                                                                                                                                                                                                                                                                                                                                                                                                                                                                                                                                                                                                                                                                                                                                                                                                                                                                                                                                                                                                                                                                        | 83     |
| #7 | (blood* OR plasma* OR serum* OR sera* OR urin*):ti,ab,kw                                                                                                                                                                                                                                                                                                                                                                                                                                                                                                                                                                                                                                                                                                                                                                                                                                                                                                                                                                                                                                                                                                                                                                                                                                                                                                                                                                                                                                                                                                                                                                                                                                                                                                                                                                                                                                                                                                                                                                                                                                                                                                                                                                                                                                                                                                                                                                                                                                                                                                                                                                                                                                                                                                                                                                                                                                                                                                                                                                                                                                                                                                                                                                                                                                                                                                                                                                                                                                                                                                                                                                                                                                                                                                                                                                                                                                                                                                                                                                                                                                                                                                                                                                                                                                                                                                                                                                                                                                                                                                                                                                                                                                                                                                                                                                                                                                                                                                                                                                                                                                                                                                                                                                                                                                                                                                                                                                                                                                                                                                                                                                                                                                                                                                                                                                                                                                                                                                                                                                                                                                                                                                                                                                                                                                                                                                                                                                                                                                                                                                                                                                                                                                                                                                                                                                                                                                                                                                                                                                                                                                                                                                                                          | 461866 |
| #6 | ((("pulmonary arterial" NEXT hypertens*) OR ("pulmonary artery" NEXT hypertens*) OR ("idiopathic pulmonary" NEXT hypertens*) OR ("primary pulmonary" NEXT hypertens*) OR ("heritable pulmonary" NEXT hypertens*) OR ("hereditary pulmonary" NEXT hypertens*)):ti,ab,kw                                                                                                                                                                                                                                                                                                                                                                                                                                                                                                                                                                                                                                                                                                                                                                                                                                                                                                                                                                                                                                                                                                                                                                                                                                                                                                                                                                                                                                                                                                                                                                                                                                                                                                                                                                                                                                                                                                                                                                                                                                                                                                                                                                                                                                                                                                                                                                                                                                                                                                                                                                                                                                                                                                                                                                                                                                                                                                                                                                                                                                                                                                                                                                                                                                                                                                                                                                                                                                                                                                                                                                                                                                                                                                                                                                                                                                                                                                                                                                                                                                                                                                                                                                                                                                                                                                                                                                                                                                                                                                                                                                                                                                                                                                                                                                                                                                                                                                                                                                                                                                                                                                                                                                                                                                                                                                                                                                                                                                                                                                                                                                                                                                                                                                                                                                                                                                                                                                                                                                                                                                                                                                                                                                                                                                                                                                                                                                                                                                                                                                                                                                                                                                                                                                                                                                                                                                                                                                                            | 1606   |
| #5 | (biomarker* OR marker* OR indicator*):ti,ab,kw                                                                                                                                                                                                                                                                                                                                                                                                                                                                                                                                                                                                                                                                                                                                                                                                                                                                                                                                                                                                                                                                                                                                                                                                                                                                                                                                                                                                                                                                                                                                                                                                                                                                                                                                                                                                                                                                                                                                                                                                                                                                                                                                                                                                                                                                                                                                                                                                                                                                                                                                                                                                                                                                                                                                                                                                                                                                                                                                                                                                                                                                                                                                                                                                                                                                                                                                                                                                                                                                                                                                                                                                                                                                                                                                                                                                                                                                                                                                                                                                                                                                                                                                                                                                                                                                                                                                                                                                                                                                                                                                                                                                                                                                                                                                                                                                                                                                                                                                                                                                                                                                                                                                                                                                                                                                                                                                                                                                                                                                                                                                                                                                                                                                                                                                                                                                                                                                                                                                                                                                                                                                                                                                                                                                                                                                                                                                                                                                                                                                                                                                                                                                                                                                                                                                                                                                                                                                                                                                                                                                                                                                                                                                                    | 92775  |
| #4 | (MicroRNA* OR (Micro NEXT RNA*) OR miRNA* OR pri-miRNA* OR stRNA* OR ("Small Temporal" NEXT RNA*) OR pre-miRNA* OR lncRNA* OR (non-coding NEXT RNA*) OR (noncoding NEXT RNA*) OR ncRNA*):ti,ab,kw                                                                                                                                                                                                                                                                                                                                                                                                                                                                                                                                                                                                                                                                                                                                                                                                                                                                                                                                                                                                                                                                                                                                                                                                                                                                                                                                                                                                                                                                                                                                                                                                                                                                                                                                                                                                                                                                                                                                                                                                                                                                                                                                                                                                                                                                                                                                                                                                                                                                                                                                                                                                                                                                                                                                                                                                                                                                                                                                                                                                                                                                                                                                                                                                                                                                                                                                                                                                                                                                                                                                                                                                                                                                                                                                                                                                                                                                                                                                                                                                                                                                                                                                                                                                                                                                                                                                                                                                                                                                                                                                                                                                                                                                                                                                                                                                                                                                                                                                                                                                                                                                                                                                                                                                                                                                                                                                                                                                                                                                                                                                                                                                                                                                                                                                                                                                                                                                                                                                                                                                                                                                                                                                                                                                                                                                                                                                                                                                                                                                                                                                                                                                                                                                                                                                                                                                                                                                                                                                                                                                 | 1127   |
| #3 | (microparticle* OR microvesicle* OR exosome* OR ectosome* OR (extracellular NEXT vesicle*) OR exovesicle* OR (apoptotic NEXT bod*)):ti,ab,kw                                                                                                                                                                                                                                                                                                                                                                                                                                                                                                                                                                                                                                                                                                                                                                                                                                                                                                                                                                                                                                                                                                                                                                                                                                                                                                                                                                                                                                                                                                                                                                                                                                                                                                                                                                                                                                                                                                                                                                                                                                                                                                                                                                                                                                                                                                                                                                                                                                                                                                                                                                                                                                                                                                                                                                                                                                                                                                                                                                                                                                                                                                                                                                                                                                                                                                                                                                                                                                                                                                                                                                                                                                                                                                                                                                                                                                                                                                                                                                                                                                                                                                                                                                                                                                                                                                                                                                                                                                                                                                                                                                                                                                                                                                                                                                                                                                                                                                                                                                                                                                                                                                                                                                                                                                                                                                                                                                                                                                                                                                                                                                                                                                                                                                                                                                                                                                                                                                                                                                                                                                                                                                                                                                                                                                                                                                                                                                                                                                                                                                                                                                                                                                                                                                                                                                                                                                                                                                                                                                                                                                                      | 769    |
| #2 | ((blood NEXT cell*) OR thrombocyte* OR platelet* OR erythrocyt* OR hemocyt* OR leukocyt* OR reticulocyt* OR granulocyt* OR (mononuclear NEXT cell*) OR (stem NEXT cell*) OR (progenitor NEXT cell*) OR (mother NEXT cell*) OR "colony forming" OR basophil* OR eosinophil* OR neutrophil* OR lymphocyt* OR monocyt* OR (killer NEXT cell*) OR (nk NEXT cell*) OR (precursor NEXT cell*) OR (suppressor NEXT cell*) OR myelocyt* OR myeloblast* OR B-cell* OR T-cell* OR ("T helper" NEXT cell*) OR Treg* OR macrophage* OR myeloid cell* OR (dendritic NEXT cell*) OR ("antigen-presenting" NEXT cell*) OR (immune NEXT cell*) OR (inflamm* NEXT cell*) OR CD4 OR CD8 OR "stem cell factor receptor"):ti,ab,kw                                                                                                                                                                                                                                                                                                                                                                                                                                                                                                                                                                                                                                                                                                                                                                                                                                                                                                                                                                                                                                                                                                                                                                                                                                                                                                                                                                                                                                                                                                                                                                                                                                                                                                                                                                                                                                                                                                                                                                                                                                                                                                                                                                                                                                                                                                                                                                                                                                                                                                                                                                                                                                                                                                                                                                                                                                                                                                                                                                                                                                                                                                                                                                                                                                                                                                                                                                                                                                                                                                                                                                                                                                                                                                                                                                                                                                                                                                                                                                                                                                                                                                                                                                                                                                                                                                                                                                                                                                                                                                                                                                                                                                                                                                                                                                                                                                                                                                                                                                                                                                                                                                                                                                                                                                                                                                                                                                                                                                                                                                                                                                                                                                                                                                                                                                                                                                                                                                                                                                                                                                                                                                                                                                                                                                                                                                                                                                                                                                                                                    | 118610 |
| #1 | ((("adipogenesis inhibitory" NEXT factor*) OR ("amcf i") OR (antiheparin NEXT factor*) OR ("autocrine motility" NEXT factor*) OR ("apo 1" NEXT antigen*) OR ("b-cell differentiation" NEXT factor*) OR ("b-cell growth" NEXT factor*) OR ("b cell proliferating" NEXT factor*) OR ("b cell stimulatory" NEXT factor*) OR ("beta 2 thromboglobulin") OR ("beta thromboglobulin") OR (bsf 1) OR (bsf 2) OR ("b cell activating" NEXT factor*) OR ("b cell maturation protein a") OR ("b lymphocyte activating" NEXT factor*) OR ("b lymphocyte stimulator") OR ("betac interleukin receptor subunit") OR ("br3 b cell activation factor receptor") OR ("b cell maturation" NEXT antigen*) OR (baff NEXT ligand*) OR (baff NEXT receptor*) OR (bcgf) OR ("bcma protein") OR ("ber h2" NEXT antigen*) OR ("blys protein") OR (chemotactic NEXT factor*) OR ("chemotactic peptid") OR ("colony stimulating" NEXT factor*) OR ("csf 10") OR ("ctla 8") OR ("cytotoxic t lymphocyte associated" NEXT antigen*) OR ("cd 127") OR ("cd134l protein") OR ("cd271 protein") OR ("cd951") OR ("csf2rb receptor") OR ("cytokine receptor gp130") OR ("c fms protein") OR ("c kit protein") OR ("c kit receptor") OR (catabolin*) OR (ccl1*) OR (ccl2*) OR (ccl3*) OR (ccl4*) OR ("ccl5") OR ("ccl7") OR ("ccl8") OR ("ccl8") OR ("ccr") OR (ccr1*) OR ("ccr3") OR ("ccr4") OR ("ccr5") OR ("ccr6") OR ("ccr7") OR ("ccr8") OR (cd115 NEXT antigen*) OR (cd116 NEXT antigen*) OR (cd117 NEXT antigen*) OR (cd118 NEXT antigen*) OR ("cd127") OR (cd130 NEXT antigen*) OR (cd131 NEXT antigen*) OR (cd134 NEXT antigen*) OR (cd134 NEXT ligand*) OR (cd137 NEXT ligand*) OR (cd153 NEXT antigen*) OR (cd154 NEXT antigen*) OR (cd178 NEXT antigen*) OR (cd254 NEXT antigen*) OR (cd257 NEXT antigen*) OR (cd265 NEXT antigen*) OR (cd266 NEXT antigen*) OR (cd267 NEXT antigen*) OR (cd268 NEXT antigen*) OR (cd27 NEXT ligand*) OR (cd30 NEXT antigen*) OR (cd30 NEXT ligand*) OR (cd357 NEXT antigen*) OR (cd40 NEXT antigen*) OR (cd40 NEXT ligand*) OR ("cd40l") OR (cd70 NEXT antigen*) OR (cd95 NEXT antigen*) OR (cd95 NEXT ligand*) OR (cdw40 NEXT antigen*) OR (chemokine*) OR ("csf 1 receptor") OR ("csf receptor") OR ("ctla8") OR ("cx3c") OR ("cxcl8") OR ("cxcr") OR ("cxcr3") OR ("cxcr4") OR ("cxcr5") OR ("cxcr6") OR (cytokin*) OR ("eosinophil differentiation factor") OR ("epidermal cell derived thymocyte activating factor") OR ("erythrocyte burst promoting factor") OR ("enbrel") OR ("erelzi") OR (ectodysplasin*) OR ("erythropoietin") OR ("etanercept") OR (fas NEXT antigen*) OR ("fas cell surface death receptor") OR (fas NEXT ligand*) OR ("fas receptor") OR ("fasl protein") OR ("fms proto oncogene protein") OR ("fn14 receptor") OR ("gamma thromboglobulin") OR ("gdf 15") OR ("growth and development factor") OR ("growth differentiation factor 15") OR ("gp130 signal transducer") OR ("g csf receptor") OR ("glucocorticoid induced tnfr related protein") OR ("gm csf receptor") OR ("gp130 transducing protein") OR ("heparin neutralizing protein") OR ("heparin neutralizing proteins") OR ("hepatocyte growth factor") OR ("hepatocyte stimulating factor") OR ("hybridoma growth factor") OR (hematopoiet*) OR (hepatopoietin*) OR ("ifn beta 2") OR ("ifn gamma inducing factor") OR ("il 1") OR ("il 10") OR ("il 11") OR ("il 12") OR ("il 12p35") OR ("il 12p40") OR ("il 13") OR ("il 15") OR ("il 16") OR ("il 17") OR ("il 17a") OR ("il 17b") OR ("il 17c") OR ("il 17d") OR ("il 17e") OR ("il 17f") OR ("il 18") OR ("il 18a") OR ("il 23 p19") OR ("il 23") OR ("il 23p19") OR ("il 3") OR ("il 4") OR ("il 5") OR ("il 6") OR ("il 7") OR ("il 8") OR ("il 9") OR ("il6st gp130") OR ("il11") OR ("il10") OR ("il11") OR ("il12") OR ("il13") OR ("il15") OR ("il16") OR ("il17") OR ("il17a") OR ("il17b") OR ("il17c") OR ("il17d") OR ("il17e") OR ("il17f") OR ("il18") OR ("il23") OR ("il3") OR ("il4") OR ("il5") OR ("il6") OR ("il7") OR ("il8") OR ("il9") OR (interferon*) OR (interleukin*) OR (kit NEXT ligand*) OR ("lcf factor") OR ("ki 1" NEXT antigen*) OR ("kit proto oncogene protein") OR ("lymphocyte activating" NEXT factor*) OR ("lymphocyte chemoattractant" NEXT factor*) OR ("lymphocyte mitogenic" NEXT factor*) OR ("lymphopoietin 1") OR ("leukemia inhibitory oncostatin m shared receptor") OR ("leukemia inhibitory factor receptor") OR ("lin") OR ("lif receptor") OR ("lineage negative") OR (lymphokine*) OR (lymphotoxin*) OR ("macrophage cell" NEXT factor*) OR ("macrophage granulocyte inducer") OR ("macrophage inflammatory protein") OR ("macrophage inflammatory proteins") OR ("mast cell growth" NEXT factor*) OR ("mcgf 2") OR (mgdf NEXT factor*) OR ("mgi 1") OR ("mgi 2") OR ("monocyte chemotactic proteins") OR ("mpl ligand") OR ("myeloid cell growth inducer") OR ("myeloid differentiation inducing protein") OR ("myeloproliferative leukemia virus oncogene ligand") OR ("m csf receptor") OR ("monocyte chemoattractant protein") OR ("monocyte chemotactic protein") OR ("natural killer cell stimulatory" NEXT factor*) OR ("neutrophil activating peptide") OR ("neutrophil activation" NEXT factor*) OR ("nf kappa b receptor activator") OR ("nf kappab receptor activator") OR ("p cell stimulating" NEXT factor*) OR ("oncostatin m leukemia inhibitory factor shared receptor") OR ("oncostatin m receptor beta") OR ("oncostatin m type i receptor") OR ("oncostatin m type ii receptor") OR ("osteoclast differentiation factor") OR ("opgl protein") OR ("osm lif receptor") OR (osteoprotegerin NEXT ligand*) OR (ox40 NEXT ligand*) OR ("ox40 receptor") OR ("ox40l protein") OR ("plasmacytoma growth factor") OR ("prostate differentiation" NEXT factor*) OR ("protein inducer mgi") OR ("p145 c kit") OR ("p145c kit") OR ("proto oncogene protein c kit") OR ("proto oncogene protein fms") OR ("proto oncogene protein kit") OR ("proto oncogene proteins c kit") OR ("recombinant g csf") OR ("recombinant gm csf") OR ("ro 23 6019") OR ("ro 236019") OR ("ru 49637") OR ("rankl") OR ("receptor activator of nf kappa b") OR ("receptor activator of nf kappab") OR ("receptor activator of nuclear factor kappa b") OR (rank NEXT ligand*) OR ("recombinant human dimeric tnfr type ii igg fusion protein") OR ("ro236019") OR ("ru49637") OR (scatter NEXT factor) OR ("steel factor") OR ("stem cell factor") OR ("sgp130") OR ("signal transducer gp130") OR ("signal transducing receptor gp130") OR ("soluble glycoprotein 130") OR ("soluble gp130") OR ("scf receptor") OR ("stem cell factor receptor") OR ("t cell growth" NEXT factor*) OR ("t cell replacing" NEXT factor*) OR ("t cell stimulating" NEXT factor*) OR ("t helper" NEXT factor*) OR ("thrombocytopoiesis stimulating" NEXT factor*) OR ("thymocyte stimulating" NEXT factor*) OR ("t b cell activating molecule") OR ("t cell gp39 antigen") OR ("tall 1 protein") OR ("tnfr fc fusion protein") OR ("tnfrsf11a protein") OR ("tnfrsf5 receptor") OR ("tnfrsf8 receptor") OR ("tnfrsf13b") OR ("tnr 001") OR ("tnr001") OR ("tnfr fc") OR ("trance protein") OR ("trance r") OR | 74840  |

|  |                                                                                                                                                                                                                                                                                                                                                                                                                     |  |
|--|---------------------------------------------------------------------------------------------------------------------------------------------------------------------------------------------------------------------------------------------------------------------------------------------------------------------------------------------------------------------------------------------------------------------|--|
|  | ("transmembrane activator and caml interactor protein") OR ("tweakr") OR ("taci receptor") OR ("tcgf") OR ("thank protein") OR (thrombocytopenin*) OR (thrombopoietin*) OR ("tnfrsf6 receptor") OR ("tnt receptor fusion protein") OR ("trance receptor") OR ("tweak receptor") OR ("transforming growth" NEXT factor*) OR ("tumor necrosis" NEXT factor*) OR ("4 lbb" NEXT ligand*) OR ("4 lbb protein")):ti,ab,kw |  |
|--|---------------------------------------------------------------------------------------------------------------------------------------------------------------------------------------------------------------------------------------------------------------------------------------------------------------------------------------------------------------------------------------------------------------------|--|

Search Omics (28<sup>th</sup> of January 2021)

| Search         | Query #1 and #2                                                                                                                                                                                                                                                                                                                                       | Items found |
|----------------|-------------------------------------------------------------------------------------------------------------------------------------------------------------------------------------------------------------------------------------------------------------------------------------------------------------------------------------------------------|-------------|
| PubMed         | #1 "Familial Primary Pulmonary Hypertension"[Mesh] OR "pulmonary arterial hypertensi*"[tiab] OR "pulmonary artery hypertensi*"[tiab] OR "idiopathic pulmonary hypertens*"[tiab] OR "hereditary pulmonary hypertens*"[tiab] OR "heritable pulmonary hypertens*"[tiab] OR "primary pulmonary hypertensi*"[tiab] OR "primary pulmonary hypertens*"[tiab] | 148         |
|                | #2 "Glycomics"[Mesh] OR "Proteomics"[Mesh] OR "Metabolomics"[Mesh] OR "glycom*"[tiab] OR "proteom*"[tiab] OR "metabolom*"[tiab] OR "lipidom*"[tiab] OR "transcriptom*"[tiab]                                                                                                                                                                          |             |
| Embase         | #1 ('pulmonary arterial hypertens*' OR 'pulmonary artery hypertens*' OR 'idiopathic pulmonary hypertensi*' OR 'primary pulmonary hypertens*' OR 'heritable pulmonary hypertensin' OR 'hereditary pulmonary hypertens*'):ti,ab,kw                                                                                                                      | 309         |
|                | #2 'glycomics'/exp OR 'proteomics'/exp OR 'metabolomics'/exp OR 'lipidomics'/exp OR 'transcriptomics'/exp OR ('glycom*' OR 'proteom*' OR 'metabolom*' OR 'lipidom*' OR 'transcriptom*'):ti,ab,kw                                                                                                                                                      |             |
| Web of Science | #1 TS=("pulmonary arterial hypertens*" OR "pulmonary artery hypertens*" OR "idiopathic pulmonary hypertensi*" OR "primary pulmonary hypertens*" OR "heritable pulmonary hypertensin" OR "hereditary pulmonary hypertens*")                                                                                                                            | 183         |
|                | #2 TS=("glycom*" OR "proteom*" OR "metabolom*" OR "lipidom*" OR "transcriptom*")                                                                                                                                                                                                                                                                      |             |
| Cochrane       | #1 (("pulmonary arterial" NEXT hypertens*) OR ("pulmonary artery" NEXT hypertens*) OR ("idiopathic pulmonary" NEXT hypertens*) OR ("primary pulmonary" NEXT hypertens*) OR ("heritable pulmonary" NEXT hypertens*) OR ("hereditary pulmonary" NEXT hypertens*)):ti,ab,kw                                                                              | 3           |
|                | #2 (glycom* OR proteom* OR metabolom* OR lipidom* OR transcriptom*):ti,ab,kw                                                                                                                                                                                                                                                                          |             |



**Table S2**

|                                                                                                                     | <b>Question 1</b>                                                                                         | <b>Question 2</b>                                                                                 | <b>Question 3</b>                                                  | <b>Question 4</b>                                                 |
|---------------------------------------------------------------------------------------------------------------------|-----------------------------------------------------------------------------------------------------------|---------------------------------------------------------------------------------------------------|--------------------------------------------------------------------|-------------------------------------------------------------------|
| <b>Patient inclusion (P)</b><br><b>Risk of bias:</b><br>0 or 1 = low risk<br>2 = unclear risk<br>3 or 4 = high risk | Was a consecutive or random sample of patients enrolled?<br><br>Random = +1 point                         | Was a case-control design avoided?<br><br>Case-control = +1                                       | Did the study avoid inappropriate exclusions?<br><br>No = +1 point | Did the study report data for iPAH uniquely?<br><br>No = +1 point |
| <b>Index test (I)</b><br><b>Risk of bias:</b><br>0 = low risk<br>1 = unclear risk<br>2 = high risk                  | Were the index test results interpreted without knowledge of the reference standard?<br><br>No = +1 point | If a threshold was used, was it predefined or based on an ROC?<br><br>No ROC = +1                 | -                                                                  | -                                                                 |
| <b>Reference test (R)</b><br><b>Risk of bias:</b><br>0 = low risk<br>1 = high risk                                  | Is a diagnosis made by RHC?<br><br>Echocardiography = + 1                                                 | Was the reference standard interpreted without knowledge of the of the index test?<br><br>No = +1 | -                                                                  | -                                                                 |
| <b>Flow and timing (T)</b><br><b>Risk of bias:</b><br>0 = low risk<br>1 = unclear risk<br>2 = high risk             | Was the index test before the reference standard and initiation of treatment?<br><br>No = +1              | Did all patients receive the same reference standard?<br><br>No = +1                              | Were all patients included in the analysis?<br><br>No = +1         | -                                                                 |

**Table S2 Adjusted risk of bias assessment tool according to the QUADAS-2.**

| <b>Table S3</b><br>Author (year)  | Markers                                               | Material               | Location                      | Con (n) | iPAH (n) | Exclusively iPAH | Treatment        | Comments inclusion                                 |
|-----------------------------------|-------------------------------------------------------|------------------------|-------------------------------|---------|----------|------------------|------------------|----------------------------------------------------|
| Andreassen, A. K., et al. (2006). | NT-proBNP                                             | plasma                 | RHC (PA)                      | 10      | 17       | yes              | incident         | -                                                  |
| Calvier, L., et al. (2016).       | sVCAM-1                                               | plasma                 | peripheral vein (non fasting) | 8       | 41       | yes              | under treatment  | included during conference, unclear reference test |
| Can, M. M., et al. (2010).        | Thrombocytes, d-dimer, fibrinogen, MPV                | plasma and whole blood | peripheral vein               | 34      | 34       | no               | under treatment  | exclusion comorbidity                              |
| Cella, G., et al. (2001).         | sP-selectin                                           | plasma                 | peripheral vein               | 10      | 15       | no               | under treatment  | -                                                  |
| Decker, I., et al. (2011).        | RBC, MCV, thrombocytes, leukocytes, Hb, Hct, RDW      | plasma and whole blood | peripheral vein               | 12      | 30       | yes              | under treatment  | -                                                  |
| Estephan, L. E., et al. (2019).   | BUN, creatinine, Hb                                   | plasma                 | RHC (specified)               | 22      | 47       | no               | under treatment  | Controls RHC                                       |
| Fares, W. H., et al. (2012).      | CRP, NT-proBNP, TIMP-1                                | serum                  | RHC (PA)                      | 33      | 25       | no               | under treatment  | -                                                  |
| Fijalkowska, A., et al. (2006).   | NT-proBNP                                             | serum                  | peripheral vein               | 9       | 36       | yes              | incident         | -                                                  |
| Gabrielli, L. A., et al. (2011).  | ALT, leukocytes, CRP, glucose (fasted), Hb            | plasma and whole blood | peripheral vein               | 14      | 14       | yes              | under treatment  | exclusion comorbidity, anti-inflammatory treatment |
| Hennigs, J. K., et al. (2014).    | CRP, fibrinogen, NT-proBNP                            | plasma                 | peripheral vein               | 11      | 52       | no               | incident         | exclusion comorbidity, controls RHC                |
| Heresi, G. A., et al. (2010).     | CXCL-10                                               | serum                  | peripheral vein               | 11      | 10       | yes              | under treatment  | exclusion comorbidity                              |
| Heresi, G. A., et al. (2010).     | HDL-C, TG                                             | plasma and whole blood | RHC (PA) and peripheral vein  | 229     | 69       | no               | incident         | -                                                  |
| Heresi, G. A., et al. (2017).     | CXCL-10, glucose (fasted), IL-6                       | plasma                 | peripheral vein               | 14      | 14       | yes              | under treatment  | exclusion comorbidity                              |
| Hoffmann, J., et al. (2015).      | TIMP-1                                                | serum                  | unclear                       | 40      | 40       | yes              | under treatment  | -                                                  |
| Itoh, T., et al. (2006).          | IL-6                                                  | serum                  | peripheral vein               | 13      | 28       | yes              | under treatment  | -                                                  |
| Jasiewicz, M., et al. (2014).     | Thrombocytes, leukocytes, creatinine, UA              | serum and whole blood  | peripheral vein (fasted)      | 24      | 26       | no               | under treatment  | -                                                  |
| Jiang, X., et al. (2008).         | UA                                                    | serum                  | RHC (VCI)                     | 98      | 78       | yes              | under treatment  | -                                                  |
| Kereveur, A., et al. (2000).      | MPV                                                   | plasma and whole blood | peripheral vein               | 19      | 16       | no               | under treatment  | only patients PG12                                 |
| Koca, F., et al. (2011).          | BUN, creatinine                                       | serum                  | peripheral vein               | 27      | 28       | no               | under treatment, | exclusion comorbidity, unclear reference test      |
| Kopec, G., et al. (2017).         | LDL-c                                                 | plasma                 | peripheral vein (fasted)      | 2431    | 63       | no               | under treatment  | -                                                  |
| Lu, G.H. et al. (2020).           | Creatinine, NT-proBNP                                 | plasma                 | peripheral vein               | 338     | 338      | no               | under treatment  | -                                                  |
| Malhotra, R., et al. (2013).      | CRP, NT-proBNP                                        | serum                  | peripheral vein               | 56      | 50       | yes              | under treatment  | -                                                  |
| Nagaya, N., et al. (1999).        | UA                                                    | serum                  | peripheral vein (fasted)      | 30      | 90       | yes              | incident         | exclusion renal failure                            |
| Petrauskas, L. A., et al. (2019). | RDW                                                   | unclear                | peripheral vein               | 101     | 181      | no               | under treatment  | exclusion comorbidity                              |
| Prins, K. W., et al. (2018).      | IL-6                                                  | serum                  | peripheral vein               | 10      | 40       | no               | incident         | -                                                  |
| Renard, S., et al. (2013).        | NT-proBNP                                             | plasma                 | RHC (VCI)                     | 50      | 49       | yes              | under treatment  | exclusion comorbidity                              |
| Rhodes, C. J., et al. (2011).     | IL-6                                                  | plasma                 | unclear                       | 40      | 139      | yes              | under treatment  | -                                                  |
| Safdar, Z., et al. (2015).        | TIMP-1                                                | serum                  | peripheral vein               | 37      | 68       | yes              | under treatment  | -                                                  |
| Santos, M., et al. (2014).        | BNP, creatinine, CRP, glucose (fasted), Hb, HDL-c, TG | serum                  | peripheral vein               | 25      | 25       | no               | under treatment  | exclusion comorbidity, anti-inflammatory treatment |
| Soon, E., et al. (2010).          | IL-6                                                  | serum                  | peripheral vein               | 21      | 70       | yes              | under treatment  | -                                                  |
| Suzuki, S., et al. (2016).        | BUN, creatinine, CRP, eGFR,                           | unclear                | unclear                       | 30      | 16       | no               | incident         | -                                                  |

|                                |                                                                                                                  |                        |                               |     |     |     |                 |                                                                                                              |
|--------------------------------|------------------------------------------------------------------------------------------------------------------|------------------------|-------------------------------|-----|-----|-----|-----------------|--------------------------------------------------------------------------------------------------------------|
|                                | Hb, Hct                                                                                                          |                        |                               |     |     |     |                 |                                                                                                              |
| Tiede, S. L., et al. (2016).   | TIMP-1                                                                                                           | plasma                 | RHC (unclear)                 | 44  | 42  | yes | incident        | -                                                                                                            |
| Varol, E., et al. (2011).      | platelets, leukocytes, creatinine, Hb, HDL-c, LDL-c, MPV, TG, total cholesterol                                  | plasma and whole blood | peripheral vein               | 25  | 22  | no  | under treatment | exclusion comorbidity, anti-coagulant treatment                                                              |
| Vrigkou, E. et al (2019)       | d-dimer, fibrinogen, Hb, Hct, creatinine, leukocytes, thrombocytes,, ALT                                         | plasma                 | RHC (PA) or peripheral vein   | 10  | 30  | no  | incident        | exclusion comorbidity, anti-coagulant treatment                                                              |
| Wang, G. F., et al. (2020).    | TG, total cholesterol, glucose (fasted), bilirubin, creatinine,UA, NT-proBNP, LDL-c, HDL-c                       | serum                  | peripheral vein               | 103 | 177 | no  | incident        | Only Han chinese                                                                                             |
| Wang, K. Y., et al. (2015).    | creatinine, CRP, HDL-c, NT-proBNP, TG                                                                            | serum                  | unclear                       | 27  | 21  | yes | under treatment | exclusion comorbidity                                                                                        |
| Yang, D., et al. (2013).       | NT-proBNP                                                                                                        | plasma                 | peripheral vein (fasted)      | 20  | 20  | yes | incident        | exclusion comorbidity                                                                                        |
| Yang, T., et al. (2014).       | CXCL-10                                                                                                          | plasma                 | peripheral vein               | 20  | 61  | yes | incident        | exclusion comorbidity                                                                                        |
| Yaoita, N., et al. (2014).     | thrombocytes, leukocytes, d-dimer, eGFR, Hb, HDL-c, LDL-c, MPV, PDW, total cholesterol, UA                       | unclear                | peripheral vein               | 15  | 19  | no  | under treatment | controls were hypertension, hyperlipidemia, hypertrophic cardiomyopathies and paroxysmal atrial fibrillation |
| Yaylali, Y. T., et al. (2019). | RBC, MCV, thrombocytes, leukocytes, fibrinogen, Hb, Hct, RDW                                                     | plasma and whole blood | peripheral vein               | 35  | 21  | no  | incident        | exclusion treatment                                                                                          |
| Yildiz, A., et al. (2013).     | leukocytes, platelets, creatinine, CRP, glucose (fasted), Hb, HDL-c, LDL-c, MPV, PDW, RDW, TG, total cholesterol | plasma and whole blood | peripheral vein (fasted)      | 22  | 25  | no  | under treatment | exclusion comorbidity, anti-coagulation treatment                                                            |
| Zhao, Q. H., et al. (2012).    | HDL-c                                                                                                            | serum                  | peripheral vein (fasted)      | 45  | 76  | yes | incident        | exclusion CVD risk factors                                                                                   |
| Zheng, Y. G., et al. (2015).   | MPV, PDW                                                                                                         | plasma and whole blood | peripheral vein (fasted)      | 82  | 82  | yes | incident        | exclusion comorbidity, anti-coagulant treatment                                                              |
| Zhu, T., et al. (2019).        | ALT, BUN, creatinine, Hb, Hct, NT-proBNP                                                                         | plasma                 | peripheral vein, (12 hr fast) | 20  | 27  | yes | incident        | age > 14 yrs, exclusion comorbidity                                                                          |

**Table S3 A detailed overview of 45 included publications**, describing markers extracted from the publication, location /type of blood draw, number of control and PAH subjects included, the treatment status of included patients, and concerns regarding inclusion methodology.

| Marker             | Studies (n) | Data distribution    | Control (n) | Weighted average   | PAH (n) | Weighted average    |
|--------------------|-------------|----------------------|-------------|--------------------|---------|---------------------|
| 5-HT, ng/mL        | 2           | mean/SD <sup>#</sup> | 28          | 4.0 ± 1.1          | 25      | 7.5 ± 3.7           |
| ADMA, μmol/mL      | 1           | mean/SD              | 22          | 0.36 ± 0.05        | 57      | 0.53 ± 0.15         |
|                    | 2           | median (IQR)         | 75          | 0.51 (0.47 – 0.57) | 77      | 0.83 (0.68 – 1.04)  |
| Ang-1, ng/mL       | 2           | median (IQR)         | 18          | 4.2 (3.2 – 5.4)    | 90      | 13.7 (10.9 – 16.5)  |
| BNP, pg/mL         | 1           | mean/SD              | 20          | 34 ± 32            | 26      | 141 ± 1233          |
|                    | 8           | median (IQR)         | 203         | 20 (10 – 37)       | 266     | 129 (34 – 457)      |
| Endostatin, ng/mL  | 2           | mean/SD              | 73          | 52.9 ± 34.4        | 65      | 55.4 ± 48.7         |
|                    | 1           | median <sup>#</sup>  | 39          | 28.1               | 37      | 62.9                |
| ET-1, ng/mL        | 2           | mean/SD              | 34          | 0.8 ± 0.4          | 34      | 2.0 ± 1.4           |
|                    | 1           | median/IQR           | 9           | 1.8 ± 1.1          | 33      | 2.6 ± 2.2           |
| Gal-3, ng/mL       | 2           | mean/SD              | 22          | 7.7 ± 2.0          | 67      | 13.2 ± 3.8          |
|                    | 1           | median/IQR           | 10          | 10.1 (9.0 – 12.7)  | 15      | 17.3 (13.2 – 21.1)  |
| HGF, ng/mL         | 1           | median/IQR           | 62          | 1.1 (1.0 – 1.3)    | 52      | 1.8 (1.3 – 2.6)     |
| HMGB1, ng/mL       | 2           | mean/SD              | 53          | 8.6 ± 4.7          | 50      | 12.1 ± 7.2          |
| IL-8, pg/mL        | 1           | mean/SD              | 21          | 14.3 ± 4.9         | 70      | 52.8 ± 148.1        |
|                    | 2           | median (IQR)         | 13          | 4.5 (4.2 – 5.78)   | 31      | 5.5 (3.9 – 8.7)     |
| MCP-1, pg/mL       | 2           | Mean/SD              | 36          | 166 ± 152          | 48      | 331 ± 180           |
|                    | 1           | Median (IQR)         | 20          | 79 (49 -93)        | 29      | 109 (65 – 142)      |
| MMP-2, ng/mL       | 2           | mean/SD              | 77          | 304.7 ± 122.2      | 67      | 305.3 ± 101.2       |
| MMP-9, ng/mL       | 2           | mean/SD              | 77          | 106 ± 119          | 67      | 62.0 ± 75           |
|                    | 1           | median (IQR)         | 37          | 237 (171 – 370)    | 68      | 434 (292 – 663)     |
| Na, mmol/L         | 2           | mean/SD              | 52          | 140 ± 2            | 61      | 138 ± 4             |
|                    | 1           | median/IQR           | 39          | 142 (139 – 144)    | 107     | 139 (137 – 142)     |
| PIGF, pg/mL        | 1           | mean/SD              | 40          | 21.8 ± 1.5         | 62      | 45.6 ± 3.5          |
|                    | 2           | median/IQR           | 13          | 29.5 (20.2 – 41.5) | 31      | 82.9 (53.6 – 126.0) |
| SCF, ng/mL         | 1           | median/IQR           | 62          | 0.80 (0.75 – 0.88) | 52      | 1.0 (0.80 – 1.25)   |
| sE-selectin, ng/mL | 2           | mean/SD              | 43          | 56.7 ± 22.1        | 40      | 79.6 ± 44.8         |
|                    | 1           | median (IQR)         | 7           | 45 (32 – 57)       | 9       | 29 (19 – 71)        |
| SOD, pg/mL         | 1           | mean/SD              | 12          | 142 ± 25           | 12      | 70 ± 30             |
| sVCAM-1, ng/mL     | 2           | mean/SD              | 41          | 931 ± 374          | 66      | 1086 ± 686          |
|                    | 1           | Median (IQR)         | 7           | 487 (279 – 1084)   | 9       | 1167 (455 – 3454)   |
| TGF-b1, ng/mL      | 2           | mean/SD              | 12          | 3.6 ± 1.3          | 16      | 2.5 ± 2.0           |
|                    | 1           | median (IQR)         | 61          | 2.6 (1.9 – 4.3)    | 216     | 4.8 (3.2 – 7.9)     |
| Tie-2, ng/mL       | 2           | median (IQR)         | 15          | 2.13 (1.83 – 2.3)  | 103     | 2.12 (1.88 – 2.20)  |
| TIMP-4, ng/mL      | 2           | mean/SD              | 77          | 1.9 ± 1.1          | 67      | 1.9 ± 1.6           |
| VEGF, pg/mL        | 2           | mean/SD              | 41          | 137 ± 101          | 66      | 159 ± 195           |
|                    | 4           | median (IQR)         | 126         | 109 (69 – 227)     | 197     | 180 (125 – 411)     |
| VEGF-A, pg/mL      | 2           | median (IQR)         | 13          | 41.2 (25.7 – 60.0) | 31      | 35.4 (23.9 – 42.7)  |
| VEGF-D, ng/mL      | 2           | median (IQR)         | 12          | 0.99 (0.95 – 1.11) | 31      | 11.32 (0.71 – 1.44) |
|                    | 1           | mean/SD              | 8           | 0.88 ± 0.31        | 41      | 0.82 ± 0.51         |
| TNF-a, pg/mL       | 4           | median (IQR)         | 80          | 1.8 (1.3 – 2.4)    | 115     | 3.7 (2.8 – 5.4)     |
|                    | 2           | mean/SD              | 34          | 5.5 ± 1.4          | 98      | 8.3 ± 3.8           |

**Table S4. Overview of pooled biomarkers described in three or more publications, that were not eligible for meta-analyses due to heterogeneity in data distribution (median with IQR, v.s. mean with SD).** 5-HT; serotonin, ADMA; asymmetric dimethylarginine, Ang-1; angiopoietin-1, BNP; brain natriuretic protein, ET-1; endothelin-1, Gal-3; galectin-3, HGF; hepatocyte growth factor, HMGB1; high mobility group box 1, IL-8; interleukin-8, MMP-2, -8; matrix metalloproteinase-2 and -8, Na; sodium, PIGF; placental growth factor, SCF; stem cell factor, SOD; superoxide dismutase, sVCAM; soluble vascular cell adhesion molecule, TGF-b1; transfor-g growth factor-b1, Tie-2; angiopoietin-1 receptor-2, TIMP-4; tissue inhibitor of metalloproteinase-4, VEGF; vascular endothelial growth factor, TNF-a; tissue necrosis factor-a. <sup>#</sup> did not report IQR, or SD.

**Table S5**

| Table S5<br>Marker             | Studies (n) | Data distribution | Control<br>(n) | Weighted<br>average | PAH (n) | Weighted average   |
|--------------------------------|-------------|-------------------|----------------|---------------------|---------|--------------------|
| Cav-1, pg/mL                   | 1           | Mean/SD           | 27             | 174 ± 135           | 21      | 34 ± 36            |
|                                | 1           | Median (IQR)      | 8              | 100 (35 – 220)      | 8       | 200 (100 – 550)    |
| RBC, cells 10 <sup>12</sup> /L | 2           | Mean/SD           | 47             | 4.77 ± 0.46         | 51      | 4.74 ± 0.58        |
| HbA1c, %                       | 2           | Mean/SD           | 44             | 5.57 ± 0.58         | 37      | 5.58 ± 0.60        |
| IL-12, pg/mL                   | 2           | Mean/SD           | 29             | 32.2 ± 23.3         | 111     | 102 ± 102          |
| K, mEq/L                       | 2           | Mean/SD           | 52             | 4.13 ± 0.38         | 61      | 4.0 ± 0.5          |
| MCV, fL                        | 2           | Mean/SD           | 47             | 87.3 ± 5.0          | 51      | 86.0 ± 7.8         |
| MDA, nmol/L                    | 2           | Mean/SD           | 26             | 3.55 ± 1.91         | 112     | 6.39 ± 1.2         |
| NO, µmol/L                     | 2           | Mean/SD           | 30             | 53.3 ± 22.3         | 35      | 60.4 ± 21.7        |
| OPN, ng/mL                     | 2           | Mean/SD           | 44             | 22.9 ± 2.7          | 95      | 40.7 ± 30.9        |
| Pim-1, ng/mL                   | 2           | Mean/SD           | 115            | 8.21 ± 3.08         | 46      | 23.4 ± 9.7         |
| Se-p, mg/L                     | 1           | Mean/SD           | 20             | 2.43 ± 0.25         | 65      | 3.07 ± 0.57        |
|                                | 1           | Median (IQR)      | 20             | 5.5 (2.8 – 8.0)     | 26      | 14.0 (7.0 – 32.0)  |
| sRAGE, ng/mL                   | 2           | Mean/SD           | 53             | 775 ± 282           | 37      | 1216 ± 596         |
| sST2, ng/mL                    | 2           | Mean/SD           | 34             | 19.0 ± 6.4          | 65      | 34.3 ± 16.1        |
| sTWEAK, pg/mL                  | 2           | Median (IQR)      | 49             | 343 (269 – 431)     | 180     | 195 (192 – 296)    |
| Total bilirubin, mg/dL         | 2           | Mean/SD           | 45             | 0.83 ± 0.28         | 36      | 0.95 ± 0.53        |
| FGF-2, pg/mL                   | 1           | Mean/SD           | 8              | 14 ± 24             | 8       | 41 ± 42            |
|                                | 1           | Median (IQR)      | 8              | 30 (14 – 41)        | 9       | 12 (8-36)          |
| ENG, ng/mL                     | 1           | Mean/SD           | 56             | 3.66 ± 0.87         | 50      | 5.12 ± 1.34        |
|                                | 1           | Median (IQR)      | 49             | 4.0 (3.4 – 4.9)     | 43      | 5.4 (4.2 – 6.4)    |
| KYN, µmol/L                    | 1           | Mean/SD           | 20             | 2.6 ± 0.1           | 20      | 3.6 (0.2)          |
|                                | 1           | Median (IQR)      | 30             | 1.9 (1.5 – 2.3)     | 26      | 2.8 (2.4 – 3.2)    |
| MCP-1, pg/mL                   | 1           | Mean/SD           | 13             | 91 ± 18             | 28      | 253 ± 127          |
|                                | 1           | Median (IQR)      | 20             | 79 (49 – 93)        | 29      | 109 (65 – 142)     |
| NOx, µmol/L                    | 1           | Median (95%-CI)   | 100            | 29.2 (21.9 – 34.4)  | 104     | 9.7 (6.7 – 12.4)   |
|                                | 1           | Median (IQR)      | 50             | 11 (5 – 19)         | 58      | 23 (15 – 34)       |
| OPG, ng/mL                     | 1           | Mean/SD           | 56             | 2.89 ± 1.17         | 50      | 3.21 ± 1.34        |
|                                | 1           | Median (IQR)      | 35             | 1.35 (0.82 – 2.02)  | 28      | 4.81 (3.52 – 5.87) |
| PIIINP, ng/mL                  | 1           | Mean/SD           | 37             | 3.08 ± 0.93         | 68      | 5.30 ± 1.87        |
|                                | 1           | Median (IQR)      | 10             | 4.1 (3.8 – 6.0)     | 15      | 4.5 (3.9 – 7.0)    |
| sFLT-1, ng/mL                  | 1           | Mean/SD           | 40             | 3.09 ± 0.25         | 62      | 5.05 ± 0.46        |
|                                | 1           | Median (IQR)      | 5              | 0.08 (0.06 – 0.08)  | 22      | 0.12 (0.09 – 0.14) |
| TFPI, ng/mL                    | 1           | Mean/SD           | 10             | 77.68 ± 10.37       | 15      | 82.73 ± 34.90      |
|                                | 1           | Median (IQR)      | 29             | 10.5 (4.0 – 16.0)   | 16      | 14.3 (4.0 – 27.6)  |
| Thrombomodulin,<br>ng/mL       | 1           | Mean/SD           | 10             | 13.00 ± 7.91        | 15      | 8.00 ± 11.62       |
|                                | 1           | Median (range)    | 29             | 40.6 (14.0 – 117.0) | 16      | 28.4 (6.5 – 54.0)  |
| TRP, µmol/L                    | 1           | Mean/SD           | 20             | 58.4 ± 3.2          | 20      | 47.8 ± 2.4         |
|                                | 1           | Median (IQR)      | 30             | 40.3 (35.2 – 46.3)  | 2       | 52.9 (46.3 – 57.5) |
| VEGFR-1, pg/mL                 | 1           | Mean/SD           | 56             | 98.7 ± 41.9         | 50      | 132.1 ± 44.6       |
|                                | 1           | Median (IQR)      | 8              | 80 (61 – 85)        | 9       | 125 (101 – 150)    |

**Table S5 Pooled biomarker levels described in two publications.** Cav-1; caveolin-1, RBC; red blood cells, HbA1c; hemoglobin A1c, IL-12; interleukin, K; potassium, MCV; mean corpuscular volume, MDA; malondialdehyde, NO; nitric oxide, OPN; osteopontin, Pim-1; provirus integration site for moloney murine leukaemia virus kinase, Se-P; selenoproteine-P, sRAGE; receptor advanced glycation end products, sST2; soluble suppression of tumorigenicity, sTWEAK; TNF-related weak inducer of apoptosis, FGF-2; fibroblast growth factor-2, ENG; endoglin, KYN; kynurine, MCP-1; monocyte chemoattractant protein-1, Nox; nitrite NO<sub>2</sub>- and nitrate NO<sub>3</sub>-, OPG; osteoprotegerin, PIIINP; N-ter-al propeptide of type III procollagen, sFLT-1; soluble fms-like tyrosine kinase 1, TFPI; tissue factor pathway inhibitor, TRP; tryptophan, VEGFR-1; vascular endothelial growth factor-1.

## Table S6

| Marker                           | Studies (n) | Participants (n) | Mean difference         | St. mean difference  | OR                 | p-value  |
|----------------------------------|-------------|------------------|-------------------------|----------------------|--------------------|----------|
| <b>Haematological markers</b>    |             |                  |                         |                      |                    |          |
| RDW, %                           | 4           | 427              | 1.83 [1.39, 2.26]       | 0.98 [0.61, 2.17]    | 0.49 [0.31, 0.75]  | <0.00001 |
| PDW, %                           | 3           | 245              | 1.42 [0.16, 2.67]       | 0.81 [0.50, 1.12]    | 0.75 [0.45, 1.13]  | <0.00001 |
| MPV, fL                          | 5           | 361              | 0.95 [0.76, 1.13]       | 1.0 [0.81, 1.25]     | 0.68 [0.25, 1.89]  | <0.00001 |
| Thrombocytes, 10 <sup>9</sup> /L | 7           | 334              | -23.9 [-38.6, -9.2]     | -0.38 [-0.62, -0.15] | 0.82 [0.46, 1.46]  | 0.001    |
| Hb, g/dL                         | 9           | 400              | -0.59 [-1.23, 0.06]     | -0.18 [-0.43, 0.07]  | 6.06 [3.06, 11.99] | 0.15     |
| Hct, %                           | 5           | 229              | -1.07 [-3.91, 1.76]     | -0.21 [-0.76, 0.34]  | 0.49 [0.31, 0.75]  | 0.46     |
| Leukocytes, 10 <sup>9</sup> /L   | 7           | 294              | -0.23 [-0.70, 0.24]     | -0.10 [-0.41, 0.21]  | 0.75 [0.45, 1.13]  | 0.52     |
| <b>Metabolic markers</b>         |             |                  |                         |                      |                    |          |
| LDL-c, mg/dL                     | 6           | 3035             | -15.82 [-26.18, -5.46]  | -0.44 [-0.65, -0.22] | 0.45 [0.30, 0.68]  | <0.00001 |
| Total cholesterol, mg/dL         | 4           | 408              | -17.70 [-24.15, -11.26] | -0.52 [-0.73, -0.32] | 0.39 [0.27, 0.56]  | <0.00001 |
| TG, mg/dL                        | 4           | 198              | -32.56 [-54.17, -10.94] | -0.52 [-0.87, -0.17] | 0.34 [0.17, 0.69]  | 0.004    |
| Glucose (fasted), mg/dL          | 3           | 103              | 24.06 [0.54, 7.58]      | 0.48 [0.08, 0.87]    | 1.25 [0.56, 2.75]  | 0.02     |
| HDL-c, mg/dL                     | 6           | 577              | -6.15 [-2.11, 14.40]    | -0.53 [-1.20, 0.15]  | 0.38 [0.11, 1.31]  | 0.13     |
| <b>Coagulation markers</b>       |             |                  |                         |                      |                    |          |
| D-dimer, ng/mL                   | 3           | 142              | 245.99 [148.55, 343.43] | 0.69 [0.27, 1.11]    | 3.59 [1.67, 7.73]  | 0.001    |
| Fibrinogen, mg/dL                | 4           | 227              | 73.75 [-2.58, 150.08]   | 0.84 [-0.14, 1.81]   | 4.67 [0.78, 28.1]  | 0.09     |
| <b>Inflammatory markers</b>      |             |                  |                         |                      |                    |          |
| IL-6, pg/mL                      | 5           | 389              | 5.01 [2.06, 7.96]       | 0.64 [0.28, 0.99]    | 3.26 [1.67, 6.33]  | 0.0005   |
| CRP, mg/L                        | 8           | 387              | 0.74 [0.13, 1.6]        | 0.25 [0.04, 0.47]    | 1.60 [1.08, 2.37]  | 0.02     |
| sVCAM-1, ng/mL                   | 3           | 150              | 626.72 [29.38, 1224.07] | 1.03 [0.53, 1.52]    | 7.83 [3.36, 18.26] | <0.00001 |
| CXCL-10, pg/mL                   | 3           | 171              | 99.77 [54.53, 145.01]   | 0.82 [0.49, 1.16]    | 4.56 [2.47, 8.42]  | <0.00001 |
| TIMP-1, ng/mL                    | 3           | 224              | 15.58 [-2.56, 33.72]    | 0.40 [0.13, 0.67]    | 3.05 [1.29, 7.21]  | 0.003    |
| sP-selectin, ng/mL               | 4           | 180              | 0.52 [-11.10, 12.14]    | -0.04 [0.35, 0.28]   | 0.89 [0.47, 1.68]  | 0.82     |
| <b>Cardiac markers</b>           |             |                  |                         |                      |                    |          |
| NT-proBNP, pg/mL                 | 10          | 1152             | 1684 [1035, 2330]       | 1.13 [0.93, 1.33]    | 7.99 [5.48, 11.62] | <0.00001 |
| <b>Renal markers</b>             |             |                  |                         |                      |                    |          |
| UA, mg/dL                        | 5           | 441              | 1.77 [1.06, 2.48]       | 0.89 [0.58, 1.12]    | 5.13 [2.90, 9.06]  | <0.00001 |
| BUN, mg/dL                       | 5           | 891              | 1.76 [0.51, 3.01]       | 0.43 [0.29, 0.56]    | 2.17 [1.7, 2.78]   | <0.00001 |
| Creatinine, mg/dL                | 10          | 475              | 0.03 [-0.04, 0.10]      | 0.13 [-0.08, 0.34]   | 1.27 [0.86, 1.87]  | 0.23     |
| eGFR, mL/-1.73 m <sup>2</sup>    | 4           | 180              | 1.70 [5.98, 9.37]       | 0.09 [-0.32, 0.49]   | 0.53 [0.23, 1.25]  | 0.67     |
| <b>Hepatic markers</b>           |             |                  |                         |                      |                    |          |
| ALT, U/L                         | 3           | 115              | 3.57 [-4.18, 11.31]     | 0.18 [-0.56, 0.92]   | 1.40 [0.36, 5.55]  | 0.37     |

**Table S6. Mean difference, standardized mean difference and OR of 26 meta-analyses.** RDW; red cell distribution width, PDW; platelet distribution width, MPV; mean platelet volume, Hb; hemoglobin, Hct; hematocrit, TG; triglycerides, LDL-c; low density lipoprotein, HDL-c; high density lipoprotein, sVCAM-1; circulating vascular cell adhesion molecule-1, CXCL-10; C-X-C motif chemokine ligand-10, IL-6; interleukin-6, TIMP-1; tissue inhibitors of metalloproteinases-1, soluble p-Selectin, CRP; c-reactive protein, NT-proBNP; N-terminal prohormone of brain natriuretic peptide, UA; uric acid, eGFR; estimated glomerular filtration rate, ALT; alanine transaminase. St. mean difference; standardized mean difference. St. mean difference; OR odds ratio.

**Table S7**

| Table S7<br>Publication bias     | Egger's regression |         | Duval & Tweedie's trim and fill |                    |                      | Orwin's fail safe<br>N | Funnel plot |
|----------------------------------|--------------------|---------|---------------------------------|--------------------|----------------------|------------------------|-------------|
|                                  | Intercept          | P-value | Original                        | Studies<br>trimmed | Adjusted             |                        |             |
|                                  |                    |         |                                 |                    |                      |                        |             |
| <b>Haematological markers</b>    |                    |         |                                 |                    |                      |                        |             |
| RDW, %                           | 2.14               | 0.27    | 0.98 [0.61, 2.17]               | 2                  | 0.77 [0.38, 1.14]    | 10                     | Fig. S2a    |
| PDW, %                           | -2.57              | 0.23    | 0.81 [0.50, 1.12]               | 2                  | 0.98 [0.67, 1.30]    | 8                      | Fig. S2b    |
| MPV, fL                          | -2.35              | <0.01   | 1.04 [0.81, 1.25]               | 3                  | 1.15 [0.96, 1.34]    | 16                     | Fig. S2c    |
| Thrombocytes, 10 <sup>9</sup> /L | -6.02              | <0.01   | -0.38 [-0.62, -0.15]            | 3                  | -0.25 [-0.50, -0.01] | 4                      | Fig. S2d    |
| Hb, g/dL                         | -0.27              | 0.94    | -0.18 [-0.43, 0.07]             | 0                  | -0.18 [-0.43, 0.07]  | -                      | Fig. S2e    |
| Hct, %                           | 6.02               | 0.62    | -0.21 [-0.76, 0.34]             | 0                  | -0.21 [-0.76, 0.34]  | -                      | Fig. S2f    |
| Leukocytes, 10 <sup>9</sup> /L   | -6.97              | 0.11    | -0.10 [-0.41, 0.21]             | 2                  | -0.04 [-0.35, 0.27]  | -                      | Fig. S2g    |
| <b>Metabolic markers</b>         |                    |         |                                 |                    |                      |                        |             |
| LDL-c, mg/dL                     | -1.07              | 0.47    | -0.44 [-0.65, -0.22]            | 1                  | -0.36 [-0.12, -0.61] | 4                      | Fig. S2h    |
| Total cholesterol, mg/dL         | 0.18               | 0.89    | -0.52 [-0.73, -0.32]            | 0                  | -0.52 [-0.73, -0.32] | 5                      | Fig. S2i    |
| TG, mg/dL                        | 0.41               | 0.88    | -0.52 [-0.87, -0.17]            | 1                  | -0.61 [-0.94, -0.28] | 6                      | Fig. S2j    |
| Glucose (fasted), mg/dL          | -4.51              | 0.72    | 0.48 [0.08, 0.87]               | 0                  | 0.48 [0.08, 0.87]    | 4                      | Fig. S2k    |
| HDL-c, mg/dL                     | 5.90               | 0.15    | -0.53 [-1.20, 0.15]             | 0                  | -0.53 [-1.20, 0.15]  | 15                     | Fig. S2l    |
| <b>Coagulation markers</b>       |                    |         |                                 |                    |                      |                        |             |
| D-dimer, ng/mL                   | -4.84              | 0.37    | 0.69 [0.27, 1.11]               | 2                  | 1.01 [0.54 - 1.48]   | 6                      | Fig. S2m    |
| Fibrinogen, mg/dL                | -2.38              | 0.91    | 0.84 [-0.14, 1.81]              | 1                  | 1.07 [0.19 - 1.95]   | 10                     | Fig. S2n    |
| <b>Inflammatory markers</b>      |                    |         |                                 |                    |                      |                        |             |
| IL-6, pg/mL                      | 2.83               | 0.20    | 0.64 [0.28, 0.99]               | 0                  | 0.64 [0.28, 0.99]    | 7                      | Fig. S2o    |
| CRP, mg/dL                       | 1.28               | 0.38    | 0.25 [0.04, 0.47]               | 1                  | 0.24 [0.03, 0.45]    | 1                      | Fig. S2p    |
| sVCAM-1, ng/mL                   | 1.5                | 0.67    | 1.03 [0.53, 1.52]               | 1                  | 1.04 [0.60, 1.49]    | 14                     | Fig. S2q    |
| CXCL-10, pg/mL                   | 1.47               | 0.78    | 0.82 [0.49, 1.16]               | 0                  | 0.82 [0.49, 1.16]    | 8                      | Fig. S2r    |
| TIMP-1, ng/mL                    | -1.98              | 0.73    | 0.40 [0.13, 0.67]               | 1                  | 0.73 [0.29, 1.16]    | 8                      | Fig. S2s    |
| sP-selectin, ng/mL               | 3.34               | 0.11    | -0.04 [0.35, 0.28]              | 0                  | -0.07 [-0.42, 0.29]  | -                      | Fig. S2t    |
| <b>Cardiac markers</b>           |                    |         |                                 |                    |                      |                        |             |
| NT-proBNP, pg/mL                 | -0.06              | 0.94    | 1.13 [0.93, 1.33]               | 0                  | 1.13 [0.93, 1.33]    | 37                     | Fig. S2u    |
| <b>Renal markers</b>             |                    |         |                                 |                    |                      |                        |             |
| UA, mg/dL                        | -2.11              | 0.46    | 0.89 [0.58, 1.12]               | 1                  | 0.82 [0.53 - 1.12]   | 14                     | Fig. S2v    |
| BUN, mg/dL                       | -0.72              | 0.40    | 0.43 [0.29, 0.56]               | 1                  | 0.43 [0.29, 0.56]    | 4                      | Fig. S2w    |
| Creatinine, mg/dL                | -0.25              | 0.94    | 0.13 [-0.08, 0.34]              | 1                  | 0.10 [-0.10, 0.31]   | -                      | Fig. S2x    |
| eGFR, mL/-1.73 m <sup>2</sup>    | 4.87               | 0.64    | 0.09 [-0.32, 0.49]              | 1                  | -0.07 [-0.09, 0.34]  | -                      | Fig. S2y    |
| <b>Herpetological markers</b>    |                    |         |                                 |                    |                      |                        |             |
| ALT, U/L                         | 2.58               | 0.86    | 0.18 [-0.56, 0.92]              | 0                  | 0.18 [-0.56, 0.92]   | -                      | Fig. S2z    |

**Table S7.** Estimation of risk of bias by Egger's regression ( $p < 0.10$ ), Duval & Tweedie's trim and fill, and Orwin's fail safe N. PDW; platelet distribution width, RDW; red cell distribution width, MPV; mean platelet volume, Hb; hemoglobin, Hct; hematocrit, TG; triglycerides, LDL-c; low density lipoprotein, HDL-c; high density lipoprotein, sVCAM-1; circulating vascular cell adhesion molecule-1, CXCL-10; C-X-C motif chemokine ligand-10, IL-6; interleukin-6, TIMP-1; tissue inhibitors of metalloproteinases-1, CRP; c-reactive protein, NT-proBNP; N-terminal prohormone of brain natriuretic peptide, UA; uric acid, eGFR; estimated glomerular filtration rate, ALT; alanine transaminase. \* publication excluded.

## Table S8

| Table S8 Publication            | Sample size    | Sample size | Source           | Method                                                                                                                                 | Principle component selection                          | Validation                                 | Selected principle component                                                                                                                                                                                                                 |
|---------------------------------|----------------|-------------|------------------|----------------------------------------------------------------------------------------------------------------------------------------|--------------------------------------------------------|--------------------------------------------|----------------------------------------------------------------------------------------------------------------------------------------------------------------------------------------------------------------------------------------------|
| Abdul-Salam, V., et al., 2006.  | 27 iPAH        | 26 control  | plasma           | Proteomics analysis using Mass spec SELDI-TOF MS                                                                                       | ROC curves, AUC                                        | ELISA                                      | C4a des Arg.                                                                                                                                                                                                                                 |
| Rhodes C.J., et al., 2017.      | 116 / 174 iPAH | 128 control | plasma           | Metabolomic profiling using liquid chromatography coupled with mass spectrometry (Metabolon, Durham, NC), logistic regression analysis | Logistic regression analysis                           | ELISA, validation cohort                   | Nucleosides (N2,N2-dimethylguanosine, N1-methylinosine), TCA cycle (malate, fumarate), glutamate, fatty acid oxydatin (acylcarnitines), and polyamine metabolites and decreased levels of steroids, sphingomyelins, and phosphatidylcholines |
| Rafikov, R., et al., 2020.      | 11 iPAH        | 23 control  | plasma           | Metabolomic liquid chromatography coupled with mass spectrometry                                                                       | Supervised clustering analysis                         | no                                         | TCA cycle, carbohydrates (glycolytic shift). Myo-inositol.                                                                                                                                                                                   |
| He, Y.Y., 2020.                 | 30 iPAH        | 30 control  | plasma           | Metabolomic mass and fragmentation analyses, using liquid chromatography-mass spectrometry                                             | Student t-test (p < 0.05),                             | Validation cohort, rodent, PASMIC          | Spermine, among 17 other plasma metabolites                                                                                                                                                                                                  |
| Hemnes, A.R., et al., 2019      | 10 PAH         | 30 control  | plasma           | Metabolomics (liquid chromatography-mass spectrometry) and proteomics (SomaLogic aptamer-based assay.)                                 | 2-way ANOVA, post hoc tests                            | Validation cohort, explanted lungs         | Long- and medium-chain acylcarnitines (fatty acid oxidation)                                                                                                                                                                                 |
| Al-Naamani, N. et al., 2016.    | 22 PAH         | 29 control  | plasma           | Lipidomics using liquid chromatography-mass spectrometry                                                                               | ROC curves, AUC                                        | Rodent with experimental PAH               | Plasma eicosanoids; including 12- and 15-HETE                                                                                                                                                                                                |
| Amsallem, M., 2021.             | 121 PAH        | 76 control  | plasma           | Proteomics multiplex immunoassay                                                                                                       | Regression analysis                                    | Rodent, Cox proportional hazard regression | HGF, Met-c                                                                                                                                                                                                                                   |
| Bujak, R., 2016.                | 20 PAH         | 20 control  | plasma           | Metabolomic high-performance liquid and gas chromatography (HPLC) coupled with mass spectrometry.                                      | Orthogonal partial least squares discriminant analysis | Glucose tolerance test                     | Metabolites related to glycolysis, lipid and fatty acid metabolism (acylcarnitines), amino acid metabolism., TCA and urea cycle                                                                                                              |
| Chen, C. et al., 2020.          | 40 iPAH        | 20 control  | serum            | Metabolomic ultra high-performance liquid and gas chromatography (HPLC) coupled with mass spectrometry.                                | ROC curves, AUC                                        | Rodent with experimental PAH               | LysoPC, PC, decanoylcarnitine (fatty acid oxidation) and l-carnitine                                                                                                                                                                         |
| Heresi, G.A., et al., 2020.     | 31 iPAH        | 31 control  | plasma           | Metabolomic high-performance liquid chromatography (HPLC) Online Tandem Mass Spectrometry (LC-MS/MS)                                   | One-way ANOVA, false discovery rate                    | Random forest analysis                     | Metabolic profiles                                                                                                                                                                                                                           |
| Karamanian, V.A., et al., 2014. | 113 PAH        | 51 control  | serum and plasma | Proteomics Multiplex immunoassays                                                                                                      | False discovery rate (PaGe)                            | Random forest analysis, PAEC               | EPO, among other growth factors                                                                                                                                                                                                              |
| Mey, J.T., et al., 2020.        | 21 PAH         | 31 control  | plasma           | Metabolomic liquid chromatography coupled with mass spectrometry (Metabolon, Durham, N.C.)                                             | One-way ANOVA                                          | Glucose tolerance test                     | Acylcarnitines (fatty acid oxidation), fatty acids, ketonic amino-acids                                                                                                                                                                      |
| Sanders, J.L., et al., 2019.    | 26 PAH         | 26 control  | plasma           | Metabolomic liquid chromatography coupled with mass spectrometry                                                                       | Two-way ANOVA                                          | Random forest, exercise                    | higher glycolytic catabolic state (TCA, fatty acid oxydation, glycolysis)                                                                                                                                                                    |
| Yu, M., et al., 2007.           | 20 iPAH        | 20 control  | serum            | Metabolomic liquid chromatography coupled with mass spectrometry                                                                       | Statistical test                                       | no                                         | Alpha-1-antitrypsin, vitronectin                                                                                                                                                                                                             |
| Zhang, J. et al., 2009.         | 10 iPAH        | 10 control  | serum            | Proteomics MALDI-TOF-MS, ELISA                                                                                                         | Statistical test                                       | no                                         | LRG, among other protein spots                                                                                                                                                                                                               |
